# Supplementary material
Source: publisher figshare collection journal article supplement (https://tandf.figshare.com/articles/dataset/_/16418799)
Supplement: Supplementary file 1 [file 1]

Supplementary material II

Table S1 and S2

Table S1 Characteristics of all included studies

| Author, reference (year of publication) | Disease | Study design      | Treatment arms (no. of patients)   | Mean treatment duration [range], mo | Mean FU duration [range], mo | No. of patients (m/f) | Mean patients age [range], y | Previous treatments (no. of patients)                                                                                                                                                                                | Mean weekly dose MTX [range]                        |
|-----------------------------------------|---------|-------------------|------------------------------------|-------------------------------------|------------------------------|-----------------------|------------------------------|----------------------------------------------------------------------------------------------------------------------------------------------------------------------------------------------------------------------|-----------------------------------------------------|
| Chartaux, 74 (2010)                     | AA      | Retrospective CS  | MTX                                | Unk [6->24]                         | 30                           | 33 (9/24)             | Unk                          | PUVA (19), OCS (10), CST bolus (5)                                                                                                                                                                                   | Unk [15-25 mg]                                      |
| Alkeraye, 77 (2017)                     | AA      | Prospective CCS   | <u>Pred + MTX (14)</u><br>Pred (6) | ≥ 6                                 | ≥ 6                          | 14                    | Unk [21-72]                  | Pred 500 mg/d; 3 d/mo for 3 mo (14)                                                                                                                                                                                  | Unk [10-20 mg]                                      |
| Anuset, 78 (2016)                       | AA      | Retrospective CS  | MTX                                | Unk                                 | 33 [6-81]                    | 26 (8/18)             | Unk                          | TCS (18), ICS (16), MNX (15), PT (14), DPCP (11), other (11)                                                                                                                                                         | Unk [15-20 mg]                                      |
| Chong, 79 (2017)                        | AA      | CS                | MTX                                | Unk                                 | Unk                          | 14                    | Unk                          | TA (14)                                                                                                                                                                                                              | 0.2 mg/kg/d                                         |
| Droitcourt, 60 (2012)                   | AA      | Retrospective CS  | MTX                                | 19 [3-30] (median)                  | 8 [7-20]                     | 20 (8/12)             | 33 [14-57] (median)          | TCS (13), MNX (14), T TAC (1), PT (4), Pred (1)                                                                                                                                                                      | Unk [12.5 - 25 mg]                                  |
| Firooz, 80 (2013)                       | AA      | Retrospective CS  | MTX                                | Unk                                 | 14.4 [4-32]                  | 10 (2/8)              | 29.6                         | Artificial hair transplant (1), AZA (2), clobetasol under occlusion (3), CST injection (1), DPCP (5), DTN (1), herbal medicine (1), levamisole (1), MNX (9), PUVA (2), Sul (2), T dinitrochlorobenzene (5), zinc (4) | Unk [5 mg/wk - 37.5 mg/d]                           |
| Hammer-schmidt, 75 (2014)               | AA      | Retrospective Co  | MTX                                | Unk                                 | 13 [3-51]                    | 31 (11/20)            | 40 [15-72]                   | T sensitizers (18), SCS (16)                                                                                                                                                                                         | Unk [10 -25 mg]                                     |
| Joly, 81 (2006)                         | AA      | Retrospective CCS | <u>Pred+MTX (16)</u><br>MTX (6)    | Unk [9-27]                          | 15                           | 22 (7/15)             | 37.6                         | IV CS (4), OCS (9), PUVA (22), TAC (3), TCS (22)                                                                                                                                                                     | Unk [15-30 mg]                                      |
| Landis, 82 (2017)                       | AA      | Retrospective CS  | MTX                                | Unk [1.5-Unk]                       | Unk                          | 14 (4/10)             | Unk [3-17]                   | Anthralin, excimer laser, IL or IM CST TCS, MNX, PT, Squaric Acid, Sul (No. Unk)                                                                                                                                     | Unk [2.5-15 mg]                                     |
| Lim, 68 (2017)                          | AA      | Retrospective Co  | MTX                                | 7.025                               | Unk [12-20]                  | 29 (16/13)            | 40.31 [16-65]                | DPCP (2), Cry (8), CSTA (3), MPP (7), SCS (9), Sul (1), TCA sc (29), TCST (29), UVB (13)                                                                                                                             | 14.5 mg [10-Unk]                                    |
| Lucas, 59 (2016)                        | AA      | Retrospective CS  | MTX                                | Unk [32.4 - 37.32]                  | Unk [2-72]                   | 5 (2/3)               | Unk, ped                     | SCS, TCS (No. Unk)                                                                                                                                                                                                   | Unk [17.5-25 mg]                                    |
| Royer, 83 (2011)                        | AA      | Retrospective CS  | MTX                                | 14.2 (1-31)                         | Unk                          | 14 (6/8)              | 14.7. (8-18)                 | Isoprinosine, OCS, PT, UVA (No. Unk)                                                                                                                                                                                 | 18.9 mg [15-25]                                     |
| Thi Van, 76 (2019)                      | AA      | Prospective Co    | MTX                                | 4                                   | 6                            | 38 (31/7)             | 29.6                         | Unk                                                                                                                                                                                                                  | 7.5 mg                                              |
| Vano-Galvan, 84 (2017)                  | AA      | Retrospective CCS | <u>MTX (10)</u><br>MTX+Pred (5)    | Unk                                 | Unk                          | 15                    | Unk                          | Unk                                                                                                                                                                                                                  | Unk [15-25 mg]                                      |
| Anderson, 87 (2019)                     | AD      | Retrospective CS  | MTX                                | 15.3                                | Unk                          | 55 (25/30)            | 10.6 [3.0-19.5]              | AZA (3), CSA (6), MPA (3), MTX (5), UVB (21)                                                                                                                                                                         | Unk [0.37 - 0.45 (Or)/ - 0.37 - 0.5 (sc) mg/kg] (1) |
| Baum, 97 (2019)                         | AD      | Retrospective Co  | MTX                                | Unk                                 | Unk                          | 19                    | Unk                          | Unk                                                                                                                                                                                                                  | Unk                                                 |

|                                |    |                                                |                                 |              |              |            |                   |                                                                                         |                                                                  |
|--------------------------------|----|------------------------------------------------|---------------------------------|--------------|--------------|------------|-------------------|-----------------------------------------------------------------------------------------|------------------------------------------------------------------|
| Delcasso, 96<br>(2018)         | AD | Retrospective Co                               | MTX                             | 21           | Unk          | 20 (8/12)  | 39                | PT and/or CSA (15)                                                                      | Unk: initial mean dose 21 mg                                     |
| Deo, 62<br>(2014)              | AD | Retrospective CS                               | MTX                             | 9.5 [2–38]   | Unk          | 31 (14/17) | Unk               | TA (31), PT (15), OCS (9), Or A (14), other (1)                                         | 0-5 Y: 7.5 mg<br>6-14 Y: 10 mg<br>15-18 Y: 15 mg<br>(all median) |
| Dvorakova~,<br>86 (2017)       | AD | Retrospective CS                               | MTX                             | 17.2 [5-33]  | Unk [Unk-14] | 47 (32/15) | Unk               | AB (18), AZA (8), CSA (8), NB-UVB PT (4), IVIG (1), SCS (16)                            | 3.4 mg/kg                                                        |
| El-<br>Khalawany,<br>64 (2013) | AD | Randomized<br>head-to-head trial               | <u>MTX (20)</u><br>CSA (20)     | 3 [Unk]      | 3 [Unk]      | 20 (12/8)  | MTX: 11.2 [8-14]  | TA (40), PT (Unk)                                                                       | MTX: 7.5 mg [Unk],                                               |
| Gerbens+, 88<br>(2018)         | AD | Open-label<br>observational<br>follow-up study | <u>MTX (17)</u><br>AZA (18)     | Unk [Unk-60] | Unk          | 17 (10/7)  | 43.3              | AZA (1), CSA (1)                                                                        | Unk [10-22.5 mg]                                                 |
| Goujon, 94<br>(2006)           | AD | Retrospective CS                               | MTX                             | Unk [1-30]   | Unk          | 20 (10/10) | 26.3 [17-68]      | Em (Unk), TCI (Unk), TCS (Unk)                                                          | Unk [7.5-25 mg]                                                  |
| Goujon, 29<br>(2017)           | AD | RCT                                            | <u>MTX (50)</u><br>CSA (97)     | 6            | Unk          | 50 (28/22) | 32                | TCI or TCS (50)                                                                         | Unk [15 - 25 mg]                                                 |
| Hegazy, 85<br>(2017)           | AD | Retrospective Co                               | MTX                             | 6            | Unk          | 37         | Unk               | Unk                                                                                     | Unk [15-20 mg]                                                   |
| Ho, 22 (2018)                  | AD | Retrospective CS                               | MTX                             | Unk          | >18          | >300       | Unk               | Unk                                                                                     | 15 mg                                                            |
| Knopfel, 57<br>(2018)          | AD | Retrospective CS                               | MTX                             | 12.6         | Unk          | 28 (24/4)  | 7.8 [2-18]        | AZA (1), CSA (6), Or AB (Unk), OCS (21), TCS (28), T AB (Unk)                           | Unk [0.2 - 0.5 mg/kg]                                            |
| Lyakhovitsky,<br>55 (2010)     | AD | Retrospective CS                               | MTX                             | Unk [2-3]    | Unk [2-24]   | 20 (12/8)  | 51.8 [20-85]      | AH, CSA (3), PT (11), SCS (15), TCS                                                     | Unk [10-25 mg]                                                   |
| Mittal, 93<br>(2011)           | AD | CS                                             | MTX                             | Unk [12-Unk] | Unk          | 15 (10/5)  | Unk [30-60]       | Unk                                                                                     | Unk [10-15 mg]                                                   |
| Politiek, 98<br>(2016)         | AD | Retrospective CS                               | MTX                             | 7.4          | Unk [Unk-2]  | 89 (53/36) | 50.7              | Or immunosuppressive drugs (62)                                                         | 13.6 mg [5-25]                                                   |
| Purvis, 52<br>(2019)           | AD | Retrospective CS                               | MTX                             | 17 (median)  | 29           | 43 (21/22) | Unk [2-16]        | CSA (2), PT (2), Pred (1), Systemic treatment (5)                                       | 0.3 mg/kg (median)                                               |
| Rahman, 91<br>(2014)           | AD | Retrospective CS                               | MTX                             | 12           | Unk          | 30         | 8 [2-17] (median) | TA (30)                                                                                 | 0.5 mg/kg [Unk-15]                                               |
| Roekevisch+,<br>43 (2018)      | AD | Open-label<br>observational<br>follow-up study | <u>AZA (18)</u><br>MTX (17)     | Unk [Unk-24] | Unk          | 17 (10/7)  | 43.3              | Unk                                                                                     | 14.5 mg [10-22.5]                                                |
| Schram, 44<br>(2011)           | AD | RCT                                            | <u>AZA (22)</u><br>MTX (20)     | 3            | 3            | 20 (10/10) | 43                | CSA (Unk)                                                                               | 17.5 - 20 mg (week 12 and<br>week 24)                            |
| Shah, 31<br>(2018)             | AD | Retrospective Co                               | MTX                             | 36.8 [1-132] | Unk          | 41 (22/19) | 45 [19-90]        | AB (3), AZA (7), CSA (5), IM CS (12), MMF (1), MTX (3), OCS (17), other (1), PT<br>(11) | Unk [7.5-25 mg]                                                  |
| Syed, 92<br>(2009)             | AD | Prospective CCS                                | <u>Placebo (30)</u><br>MTX (30) | 3            | Unk          | 30         | Unk               | Unk                                                                                     | 0.1 mg/kg [5-7.5]                                                |
| Taieb, 90<br>(2019)            | AD | Retrospective CS                               | MTX                             | 14 (median)  | 25 (median)  | 26 (13/13) | 12 (median)       | CS (12), other systemic immunosuppressive (4), PT (23)                                  | Unk [0.3-0.6 mg/kg]                                              |

|                            |        |                      |                                                           |                |                      |            |              |                                                                      |                                      |
|----------------------------|--------|----------------------|-----------------------------------------------------------|----------------|----------------------|------------|--------------|----------------------------------------------------------------------|--------------------------------------|
| Vedie, 95<br>(2016)        | AD     | Retrospective Co     | MTX                                                       | 20.4 - 27.9    | 57.8                 | 35         | Unk          | AZA, TCS (No.Unk)                                                    | Unk [15-20 mg]                       |
| Weatherhead, 89<br>(2007)  | AD     | Prospective CS       | MTX                                                       | 6              | 3                    | 12 (7/5)   | 37           | TCS (12)                                                             | Unk [5-22.5 mg]                      |
| Zoller, 70<br>(2008)       | AD     | Retrospective CS     | MTX                                                       | 3-28           | Unk                  | 9 (6/3)    | 75 [52-85]   | CSA (Unk), PT (Unk), SCS (Unk), TCI (Unk), TCS (9)                   | Unk [5-20 mg]                        |
| Roberts, 46<br>(2010)      | AD, NE | Retrospective CS     | MTX                                                       | 10.5 [3-30]    | 9 [1-22]             | 25         | 7 (3-16)     | MTX (90)                                                             | Unk [5-15 mg]                        |
| Patel, 154<br>(2018)       | All CE | Retrospective Co     | MTX                                                       | Unk [3.2-53.1] | Unk                  | 32         | Unk          | Unk                                                                  | Unk [Unk-30 mg]                      |
| Kalyoncu, 153<br>(2016)    | AO SD  | Retrospective Co     | <u>CS+MTX (117)</u><br>CS+HCQ+MTX (85)                    | Unk            | Unk                  | Unk        | Unk          | Unk                                                                  | Unk                                  |
| Bakker, 48<br>(2013)       | BP     | Retrospective CS     | MTX                                                       | 4              | 26.4 [3-96]          | 6 (Unk)    | Unk          | Unk                                                                  | Unk [5-15 mg]                        |
| Bara, 100<br>(2003)        | BP     | CS                   | MTX                                                       | Unk            | 11.4 [4-23]          | 16 (7/9)   | 84.6         | Unk                                                                  | Unk [10-15mg]                        |
| Dereure, 101<br>(2002)     | BP     | Prospective CS       | MTX                                                       | Unk [2-Unk]    | Unk [6 - Unk]        | 18 (7/11)  | 77.8         | Potent TCS 2-3 wks (18)                                              | Unk [7.5-12.5 mg]                    |
| Du-Thanh, 99<br>(2011)     | BP     | Retrospective CS     | MTX                                                       | 8.48 [1-18]    | Unk                  | 70 (30/40) | 82.7 [50-97] | Unk                                                                  | 9.8 mg                               |
| Heilborn, 63<br>(1999)     | BP     | Prospective CS       | MTX                                                       | Unk [3-24]     | 24                   | 11 (4/7)   | 81 [73-91]   | TCS (Unk)                                                            | Unk [5-12.5 mg]                      |
| Kjellman, 102<br>(2008)    | BP     | Retrospective<br>CCS | <u>MTX (61)</u><br>MTX+pred (37)                          | Unk            | 26 (median) [0.5-77] | 98 (39/59) | Unk          | Unk                                                                  | Unk [2.5-17.5 mg]                    |
| Kremer, 104<br>(2017)      | BP     | Retrospective CS     | MTX                                                       | Unk            | Unk                  | 6          | Unk          | CS (Unk)                                                             | Unk                                  |
| Kwatra, 36<br>(2013)       | BP     | Retrospective CS     | MTX                                                       | 25.3           | Unk [20.4-66]        | 16 (8/8)   | 71.4 [30-94] | Unk                                                                  | Unk [2.5-15 mg]                      |
| Paul, 104<br>(1994)        | BP     | Retrospective CS     | MTX                                                       | Unk [10-39]    | Unk [10-44]          | 8 (4/4)    | 73.5 (63-87) | AB (3), TCS (3), SCS (8)                                             | Unk [5-20 mg]                        |
| Click, 107<br>(2013)       | DM     | Retrospective CS     | MTX                                                       | Unk [4-Unk]    | Unk                  | 8 (0/8)    | 39 [25-60]   | IVIG (1), MPA (2), HCQ (6), AZA (1)                                  | Unk [15-25 mg]                       |
| Hornung, 28<br>(2012)      | DM     | Retrospective CS     | MTX                                                       | Unk [2-3]      | Unk                  | 11 (3/8)   | 61 [46-84]   | SCS (11), AZA (4), MPA (1)                                           | 14.91 mg                             |
| Kasteler, 26<br>(1997)     | DM     | Retrospective CS     | MTX                                                       | Unk [3-22]     | Unk                  | 13 (0/13)  | 48 [22-77]   | AZA (1), Chlorambucil (1), CQ (7), HCQ (6), Pred (2), Quinacrine (2) | 18.5 mg [2.5-30] (mean maximal dose) |
| Ramanan, 106<br>(2005)     | DM     | Retrospective Co     | MTX                                                       | 45.5 (median)  | 48                   | 31 (11/20) | 8.4          | Unk                                                                  | 15 mg/m <sup>2</sup>                 |
| Ruperto, 105<br>(2016)     | DM     | RCT                  | <u>Pred (47)</u><br><u>Pred+CSA (46)</u><br>Pred+MTX (46) | Unk            | 35.5 (median)        | 46 (16/30) | Unk          | Pred (3)                                                             | 15-20 mg/m2                          |
| Zieglschmid, 108<br>(1995) | DM     | Retrospective CS     | MTX                                                       | 1.8-68.5       | Unk                  | 10 (1/9)   | Unk [27-79]  | Pred (8)                                                             | 8 mg (mean initial) - 15.92 (max)    |

|                           |             |                  |                                                                 |               |              |                                    |                                            |                                                                                                                                  |                          |
|---------------------------|-------------|------------------|-----------------------------------------------------------------|---------------|--------------|------------------------------------|--------------------------------------------|----------------------------------------------------------------------------------------------------------------------------------|--------------------------|
| Chen, 109<br>(2016)       | E           | Co               | MTX                                                             | 22 [2-93]     | Unk          | 41 (27/14)                         | 49 [18-83]                                 | PT (14), CSA (30), MPA (9), AZA (7)                                                                                              | Unk [10-25 mg]           |
| Shaffrali, 110<br>(2003)  | E           | Retrospective CS | MTX                                                             | Unk [3-18]    | Unk          | 5 (2/3)                            | 74.4 [67-83]                               | AZA, OCS, PT, TCS (No. Unk)                                                                                                      | Unk [2.5-12.5 mg]        |
| Téart, 49<br>(2011)       | E           | Retrospective CS | MTX                                                             | 2.6           | 12           | 15 (11/4)                          | 78                                         | CSA (1), Pred (1), PT (5), TCS (15), TA (3)                                                                                      | 9.7 mg                   |
| Berianu, 111<br>(2015)    | EF          | Retrospective CS | MTX                                                             | 31.4 [12-84]  | Unk [12-36]  | 16 (8/8)                           | 52 [30-75]                                 | Pred (13), AZA (3), HCQ (2)                                                                                                      | Unk                      |
| Lebeaux, 112<br>(2012)    | EF          | Retrospective CS | MTX                                                             | 24.7 [5-93]   | Unk          | 12                                 | Unk                                        | OCS (12)                                                                                                                         | Unk [15-30 mg]           |
| Mertens, 45<br>(2016)     | EF          | Prospective Co   | MTX                                                             | 5             | Unk          | 12 (1/11)                          | Unk [37-69]                                | MTX (6), SCS (6)                                                                                                                 | 288 mg/kg/month (median) |
| Kroft, 71<br>(2009)       | EF/M/S<br>S | Retrospective Co | <u>MTX (47)</u><br>MTX+CST (11)                                 | Unk [10-16]   | Unk          | 58 (18/40)                         | 40 [13-67]                                 | AB (7), antimalarials (5), AZA (1), Em (3), isotretinoin (3), penicillamine (5), PT (4),<br>TCS (16), TCA lesional injection (1) | Unk [15-25 mg]           |
| Hossain, 155<br>(2013)    | ENL         | Prospective CS   | MTX                                                             | Unk [24-30]   | 24           | 9 (7/2)                            | 34 [23-52]                                 | Clofazamine (9), Pred (9)                                                                                                        | 7.5 mg                   |
| Naka, 53<br>(2018)        | GA          | Retrospective Co | MTX                                                             | Unk [Unk-60]  | Unk [Unk-72] | 11 (2/9)                           | 60.7                                       | Ada, AZA, dapson, kenalog injections, PT, SCS, TA, TCS, UVB (No. Unk)                                                            | Unk [12.5-15 mg]         |
| Politiek, 156<br>(2016)   | HE          | Retrospective Co | MTX                                                             | 4.6           | Unk [Unk-2]  | 42 (29/13)                         | 53.2                                       | Systemic treatment (7)                                                                                                           | Unk [5-20 mg]            |
| Arfi, 115<br>(1995)       | LE          | CS               | MTX                                                             | Unk [1-24]    | Unk          | 16                                 | 33 [16-48]                                 | Unk                                                                                                                              | Unk [7.5-10 mg]          |
| Böhm, 33<br>(1998)        | LE          | Retrospective CS | MTX                                                             | Unk [1-12]    | Unk          | 12 (6/6)                           | 53 [28-86]                                 | AZA (1), CQ (5), SCS (9), TCS (2)                                                                                                | Unk [10-25 mg]           |
| Böhm, 116<br>(2003)       | LE          | Retrospective CS | MTX                                                             | Unk [0.25-25] | 27.9 [6-62]  | 22 (9/13)                          | 46.5 [27-74]                               | Pred, antimalarials (No. Unk)                                                                                                    | Unk [10-30 mg]           |
| Carneiro, 113<br>(1999)   | LE          | RCT              | <u>MTX (20)</u><br>Placebo (21),<br>28 with skin<br>involvement | 6             | Unk          | 41 (2/39)                          | 32.1                                       | Antimalarial, immunosuppressive                                                                                                  | Unk [15-20 mg]           |
| Fruchter\$, 117<br>(2017) | LE          | Retrospective CS | MTX                                                             | Unk           | 58           | 27                                 | Unk                                        | HCQ sulphate (No. Unk), antimalarial (No. Unk)                                                                                   | 16.6 mg                  |
| Gansauge, 54<br>(1997)    | LE          | Prospective CS   | MTX                                                             | 6             | Unk          | 10                                 | Unk                                        | Antimalarials, Pred (No. Unk)                                                                                                    | 15 mg                    |
| Islam, 114<br>(2012)      | LE          | RCT              | <u>MTX (13)</u><br>CQ (29)                                      | 6             | 6            | 13 (0/13)                          | 24                                         | Unk                                                                                                                              | 10 mg                    |
| Kan, 118<br>(2016)        | LE          | Retrospective Co | MTX                                                             | Unk           | 48           | 27                                 | Unk                                        | None                                                                                                                             | Unk                      |
| Wenzel, 119<br>(2005)     | LE          | Retrospective CS | MTX                                                             | 25.6 [2-67]   | Unk [Unk-24] | 43 (13/30)                         | 52 (19-86)                                 | TA (43), antimalarials (31), AZA (6), dapsone (2), MMF(4)                                                                        | Unk [7.5-20 mg]          |
| Chauhan, 120<br>(2018)    | LP          | Prospective CCS  | <u>MTX (15)</u><br>MTX + TCA (15)                               | Unk [≤ 4]     | Unk [≤ 8]    | 30 (9/6, MTX),<br>(8/7, MTX + TCA) | MTX: 46.33 [40-52]<br>+ TCA: 45.53 [36-55] | Unk                                                                                                                              | Unk [Unk - 0.3 mg/kg]    |
| Ilyas, 39<br>(2016)       | LP          | Prospective Co   | MTX                                                             | 3             | 3            | 55 (23/32)                         | 37 [22-65]                                 | Unk                                                                                                                              | 15 mg                    |

|                                       |                  |                   |                             |                 |                     |            |                               |                                                                                           |                                    |
|---------------------------------------|------------------|-------------------|-----------------------------|-----------------|---------------------|------------|-------------------------------|-------------------------------------------------------------------------------------------|------------------------------------|
| Kanwar, 38<br>(2013)                  | LP               | Prospective CS    | MTX                         | Unk [Unk-24]    | 3                   | 24 (8/16)  | 37.4 [9-63], 2 children [Unk] | Unk                                                                                       | Adults: 15 mg, children 0.35 mg/kg |
| Lajevardi, 27<br>(2016)               | LP               | Prospective CS    | MTX                         | 3               | 3                   | 18 (5/13)  | 53.8 [30-65]                  | MMF (4), SCS (11), TCI (3), TCS/IL CST (13)                                               | 15 mg                              |
| Malekzad, 32<br>(2012)                | LP               | Prospective Co    | MTX                         | Unk [8-Unk]     | 6                   | 18 (8/10)  | 51.1 [22-80]                  | Unk                                                                                       | Unk [≤10 mg]                       |
| Torti, 121<br>(2007)                  | LP               | Retrospective CS  | MTX                         | Unk             | 27                  | 18         | Unk                           | Unk                                                                                       | Unk [2.5-12.5 mg]                  |
| Turan, 122<br>(2009)                  | LP               | Retrospective CS  | MTX                         | Unk [1-4]       | 6                   | 11 (3/8)   | 44.2 [27-55]                  | SCS (4), TCS (7)                                                                          | Unk [15-20 mg]                     |
| Kortekangas-Savolainen, 123<br>(2007) | LP, vulvovaginal | Retrospective CS  | MTX                         | Unk [6-36]      | Unk [12-48]         | 5 (0/5)    | 57.6 [45-65]                  | Repeated vaginal dilatations (5), TAC (2), tetracycline (1), TCS (2)                      | 7.5 mg                             |
| Babahosseini, 124<br>(2019)           | LPP              | Retrospective CS  | MTX                         | Unk             | Unk                 | 30         | Unk                           | Unk                                                                                       | Unk                                |
| Bakhtiar, 127<br>(2018)               | LPP              | RCT               | <u>MTX (79)</u><br>OCS (79) | 2 [Unk]         | Unk                 | 79 (47/32) | Unk                           | Unk                                                                                       | 10 mg                              |
| Bulbulbaskan, 125<br>(2017)           | LPP              | Retrospective CCS | <u>MTX (10)</u><br>CSA (6)  | Unk [3-6]       | Unk                 | 10 (2/8)   | Unk                           | Unk                                                                                       | Unk [10-15 mg]                     |
| Kerkemeyer, 126<br>(2018)             | LPP              | Retrospective CS  | MTX                         | Unk             | Unk                 | 7          | Unk                           | Unk                                                                                       | Unk                                |
| Naeni, 128<br>(2017)                  | LPP              | RCT               | <u>HCQ (14)</u><br>MTX (15) | 6               | Unk                 | 15 (2/13)  | 44.9                          | Ac (2), CSA (4), isotretinoin (2), pioglitazone (1) SCS (8), TCS (15)                     | 15 mg                              |
| Karadag, 163<br>(2018)                | LS               | Prospective CS    | MTX                         | 12.6 [3-18]     | 10.6 [6-17]         | 6 (0/6)    | 53 [46-63]                    | Ac (2), Colchicine (3), TCS (6), UVA (2), NB UVB (1)                                      | 7.5 mg                             |
| Kreuter, 164<br>(2009)                | LS               | Retrospective CS  | MTX                         | >6              | 4.7 [3-8]           | 7 (1/6)    | 67.6 [50-80]                  | Ac (1), NB-UVB PT (1), penicillin (3), T calcipotriene (1), TCS (7), UVA PT (3), PUVA (2) | 15 mg                              |
| Fernandez-de-Misa, 157<br>(2018)      | LyP              | Retrospective CS  | MTX                         | Unk             | 52 [1-277] (median) | 51         | Unk                           | Unk                                                                                       | Unk [≤20 mg]                       |
| Bulur, 129<br>(2017)                  | M                | Retrospective CS  | MTX                         | Unk             | 5                   | 14         | Unk                           | Colchicine, SCS, TCS (No. Unk)                                                            | Unk                                |
| Christen-Zaech, 35<br>(2008)          | M                | Retrospective CS  | MTX                         | 19.9 [3-52]     | Unk                 | 39         | 9.8                           | Unk                                                                                       | Unk [0.3-0.5 mg/kg till 35 mg/wk]  |
| Cox, 61<br>(2008)                     | M                | Retrospective CCS | <u>MTX (9)</u><br>CSA (1)   | 23 [10-36]      | Unk                 | 9          | 7.4 [4-16]                    | D-penicillamine (2), CSA (2), SCS 30 mg/kg/d, 3 d/mo for 3 mo (10)                        | 0.3 mg/kg                          |
| Fitch, 67<br>(2006)                   | M                | Retrospective CS  | MTX                         | 4-7             | >6                  | 17 (6/11)  | 7.3                           | TCI (2), TCS (11), T vit D (11)                                                           | Unk [12.5-25 mg]                   |
| Koch, 41<br>(2013)                    | M                | Retrospective CS  | MTX                         | 19.6 [5.8-52.8] | 55.2 [11.3 -162]    | 17 (9/8)   | 15.2 [4-25]                   | Unk                                                                                       | 9.12 mg [2.5-15]                   |
| Kreuter, 135<br>(2005)                | M                | Prospective CS    | MTX                         | 9.8 [6-25]      | >6                  | 15 (6/9)   | 50.7 [18-73]                  | Penicillin (7), PUVA (6), SCS (4), TCS (3)                                                | 15 mg                              |

|                               |     |                  |                                                                                   |                 |                     |             |                     |                                                                                                                                                                       |                                                               |
|-------------------------------|-----|------------------|-----------------------------------------------------------------------------------|-----------------|---------------------|-------------|---------------------|-----------------------------------------------------------------------------------------------------------------------------------------------------------------------|---------------------------------------------------------------|
| Li, 130 (2019)                | M   | Prospective Co   | <u>MTX mono (12)</u><br><u>MTX with iv Cst</u><br><u>(23)</u> MTX<br>with OCS (9) | 12              | Unk                 | 44 (13/31)  | 12.6                | Systemic treatment (7)                                                                                                                                                | Unk [1 mg/kg, max 25 mg]                                      |
| Mertens, 65 (2016)            | M   | Retrospective Co | MTX                                                                               | 12.3 [1-65.3]   | Unk                 | 107 (30/77) | Unk                 | Unk                                                                                                                                                                   | 15 mg [5-26.9 mg]                                             |
| Mirsky, 131 (2012)            | M   | Retrospective Co | MTX                                                                               | 28.8            | Unk [7.3-7.0]       | 90 (32/58)  | 10.2                | MTX (90)                                                                                                                                                              | Unk [Unk-15 mg]                                               |
| Piram, 132 (2013)             | M   | Retrospective CS | MTX                                                                               | 24              | Unk                 | 24          | Unk                 | Unk                                                                                                                                                                   | 0,5 mg/kg                                                     |
| Platsidaki, 50 (2017)         | M   | Retrospective CS | MTX                                                                               | Unk [Unk-12]    | 21                  | 20 (3/17)   | Unk                 | HCQ (3), penicillamine (2), PUVA (20), SCS (20), TCI (20), TCS (20), vit D analogues (20)                                                                             | 15 mg                                                         |
| Rattanaakaema korn, 69 (2017) | M   | Retrospective CS | MTX                                                                               | Unk [2-Unk]     | Unk [7-33.6]        | 7 (3/4)     | 11.8                | TCS (1)                                                                                                                                                               | Pediatric dose; Unk [2.5 mg-Unk], adult dose; Unk [10 mg-Unk] |
| Seyger, 136 (1998)            | M   | Prospective CS   | MTX                                                                               | 6               | 0                   | 9 (2/7)     | 47.8 [34-71]        | Systemic treatment, TA (No. Unk)                                                                                                                                      | Unk [15-25 mg]                                                |
| Shahidi, 42 (2018)            | M   | CS               | MTX                                                                               | 18              | Unk                 | 33 (5/28)   | 29 [10-61] (median) | Unk                                                                                                                                                                   | Unk [15 mg-Unk]                                               |
| Torok, 30 (2012)              | M   | Prospective Co   | MTX                                                                               | 36              | 36.4                | 36 (11/25)  | 7.9                 | CSA (2), MTX (1), TA (25)                                                                                                                                             | 1 mg/kg                                                       |
| Uziel, 133 (2000)             | M   | Prospective CS   | MTX                                                                               | Unk [2-13]      | Unk [8-30]          | 10 (4/6)    | 6.8 [2-12]          | D-penicillamine (1), naproxen (1), Pred (2), TCS (1)                                                                                                                  | Unk [0.3-0.6 mg/kg]                                           |
| Weibel, 134 (2006)            | M   | Retrospective CS | MTX                                                                               | Unk             | 35                  | 34 (11/23)  | 8.2 [2.3-15.2]      | PT (1), systemic therapy (1), TCS (10)                                                                                                                                | Unk [10-12.4 mg/m2]                                           |
| Wlodek, 137 (2018)            | M   | Retrospective CS | MTX                                                                               | Unk             | Unk                 | 8 (0/8)     | 62 (52-69) (median) | Bath PUVA (3), HCQ (3), Pred (3), TL-01 (1)                                                                                                                           | Unk [2.5-30 mg]                                               |
| Zulian, 51 (2011)             | M   | RCT              | <u>MTX (46)</u><br>Placebo (24)                                                   | Unk [Unk-12]    | 40.3 [3-72]         | 46 (34/12)  | 9                   | Antimycotics/AB (13), CSA (1), D-penicillamine (6), TCS (22)                                                                                                          | 15 mg/m2 [Unk-20 mg]                                          |
| Zulian±, 56 (2012)            | M   | Prospective Co   | MTX                                                                               | 27.5 [Unk - 72] | Unk                 | 65 (16/42)  | 9.4 [Unk]           | Antimycotics/AB (13), CSA (1), D-penicillamine (6), TCS (22)                                                                                                          | 15 mg/m2 [Unk-20 mg]                                          |
| Torrelo, 158 (2017)           | Pa  | Retrospective CS | MTX                                                                               | Unk [3-Unk]     | Unk                 | 5 (1/4)     | 4.3 [1.5-8]         | Unk                                                                                                                                                                   | Unk [0.3-0.4 mg/kg]                                           |
| Moustafa, 159 (2015)          | PD  | Retrospective CS | MTX                                                                               | 14.5 [2-65]     | 65                  | 12          | 63.5 (median)       | Anti-pruritics (6), doxepin (2), neurontin (1), Pred (7)                                                                                                              | Unk [2.5-10 mg]                                               |
| Rivitti, 23 (1973)            | PF  | Retrospective CS | MTX                                                                               | Unk             | Unk                 | 8 (2/6)     | 24                  | MTX (8), OCS (Unk)                                                                                                                                                    | Unk [20-37.5 mg]                                              |
| Spring, 160 (2014)            | PN  | Retrospective CS | MTX                                                                               | Unk [2-24]      | Unk                 | 13 (4/9)    | 75.8                | Antipruritic agents, PT, TCS (No. Unk)                                                                                                                                | Unk [7.5-20 mg]                                               |
| Egan, 24 (1999)               | PPP | Retrospective CS | MTX                                                                               | Unk [1-Unk]     | Unk [1-Unk]         | 5 (4/1)     | 50 [39-62]          | SCS (4), TCS (5), PUVA (3), CSA (1), ET (1)                                                                                                                           | Unk [12.5-22.5 mg]                                            |
| Klejtman, 162 (2018)          | Pr  | Retrospective CS | MTX                                                                               | Unk             | 16 [2-108] (median) | 39 (16/23)  | 62 [28-94] (median) | Ac (4), AH (34), AZA (1), Capsaicin (1), CSA (4), Em (28), HCQ (1), MMF (1), Naltrexone (2), O CS (3), Pregabalin (5), PT (22), T TAC (10), TCS (38), Thalidomide (9) | 15 mg [5-25]                                                  |

|                               |     |                  |                                                |                 |              |            |                     |                                                                                                                                       |                                       |
|-------------------------------|-----|------------------|------------------------------------------------|-----------------|--------------|------------|---------------------|---------------------------------------------------------------------------------------------------------------------------------------|---------------------------------------|
| Sharma, 161<br>(2007)         | PrD | Retrospective CS | MTX                                            | Unk [6-Unk]     | Unk          | 7          | Unk                 | TCS (7), sunscreens (7)                                                                                                               | 15 mg                                 |
| Allison, 138<br>(2002)        | PRP | CS               | MTX                                            | Unk             | Unk          | 5          | Unk                 | Unk                                                                                                                                   | Unk                                   |
| Chapalain, 139<br>(1999)      | PRP | Retrospective CS | MTX                                            | 12.1 [4.5-19.5] | Unk          | 5          | 67 [45-87]          | AC (2), TCS (5),<br>PUVA therapy (1)                                                                                                  | Unk [15-25 mg]                        |
| Dicken, 140<br>(1994)         | PRP | CS               | MTX                                            | 6 [2-12]        | Unk          | 8 (5/3)    | Unk [35-74]         | Vit A (3), isotretinoin (3)                                                                                                           | Unk [10-25 mg]                        |
| Knowles, 141<br>(1970)        | PRP | Retrospective CS | MTX                                            | Unk [4-7]       | Unk          | 6 (6/0)    | 48.3 [40-60]        | Pred (2)                                                                                                                              | Unk [2.5-5mg/d till 75mg/wk]          |
| Baum, 34<br>(2012)            | PV  | Retrospective CS | MTX                                            | 31 [6-96]       | Unk [6-30]   | 30 (6/24)  | 54 [35-78]          | AZA (18), dapsone (14), CSA (3), CP (2), MPA (1), IVIG (2)                                                                            | 15 mg                                 |
| Lever, 142<br>(1972)          | PV  | CCS              | <u>Pred -&gt; MTX (15)</u><br>MTX -> pred (9)  | Unk [10-106]    | Unk          | 24         | 51.2 [20-79]        | Pred, MTX (No. Unk)                                                                                                                   | Unk                                   |
| Mashkilleyson , 143<br>(1988) | PV  | CS               | MTX                                            | Unk             | Unk          | 53         | Unk                 | Unk                                                                                                                                   | Unk [25-50 mg (also in daily dosage)] |
| Peck, 25<br>(1971)            | PV  | Retrospective CS | MTX                                            | Unk             | Unk [4-204]  | 13 (3/10)  | Unk [18-76]         | CST (13)                                                                                                                              | Unk [10-50 mg]                        |
| Smith, 144<br>(1999)          | PV  | Retrospective CS | MTX                                            | 3               | Unk [6-Unk]  | 9 (8/1)    | 59                  | AZA (Unk), CP (Unk), Pred (9)                                                                                                         | Unk [7.5-17.5 mg]                     |
| Tran, 40<br>(2013)            | PV  | Retrospective CS | MTX                                            | Unk [3-Unk]     | Unk [26-Unk] | 23 (11/12) | 54                  | AZA (3), dapsone (2), etanercept (1), IVIG (2), MMF (7), Pred (23), rituximab (2)                                                     | Unk [7.5-35 mg]                       |
| Lower, 145<br>(1995)          | Sar | Prospective CS   | MTX                                            | Unk [24-Unk]    | Unk [Unk-84] | 22         | 39                  | Antimalarial agents (Unk), nonsteroidals (Unk), Pred (3)                                                                              | Unk [≤15 mg]                          |
| Veien, 146<br>(1997)          | Sar | Co               | MTX                                            | 23 [1-72]       | Unk          | 16         | 51 [36-68]          | Unk                                                                                                                                   | Unk [Unk-25 mg]                       |
| Schanz, 72<br>(2013)          | Scl | Prospective Co   | MTX                                            | Unk             | Unk [6-12]   | 22 (6/16)  | 52 (median)         | Unk                                                                                                                                   | 15 mg                                 |
| Breuckmann, 73<br>(2005)      | SD  | Retrospective CS | MTX                                            | 6               | Unk          | 7 (5/2)    | 56 [39-65]          | Unk                                                                                                                                   | 25 mg                                 |
| Herrick, 147<br>(2017)        | SS  | Prospective Co   | <u>MTX (65)</u><br><u>MMF (118)</u><br>CP (87) | 24              | Unk          | 65 (15/50) | Unk                 | Unk                                                                                                                                   | Unk [20-25 mg]                        |
| Pope, 150<br>(2001)           | SS  | RCT              | <u>MTX (35)</u><br>Placebo (36)                | 12              | 18 (median)  | 35 (4/31)  | 47                  | CST (10)                                                                                                                              | Unk [10-17.5 mg]                      |
| Sumanth, 148<br>(2007)        | SS  | Prospective CS   | MTX                                            | Unk [6-12]      | Unk          | 33 (4/29)  | 31 [17-51]          | Unk                                                                                                                                   | 15 mg                                 |
| Van den Hoogen, 149<br>(1996) | SS  | RCT              | <u>MTX (17)</u><br>Placebo (12)                | 24              | 24           | 17         | 52 [32-75]          | Colchicine (1), penicillamine (10), Pred (7), NSAID's (6)                                                                             | 15 mg                                 |
| Leducq, 151<br>(2019)         | Ur  | RCT              | <u>MTX (39)</u><br>Placebo (36)                | 4.5             | 2            | 39 (11/28) | 46.4                | Colchicine (8), corticosteroids (22), montelukast (19)                                                                                | Unk [0.2-0.25 mg/kg]                  |
| Perez, 66<br>(2010)           | Ur  | Retrospective CS | MTX                                            | Unk             | Unk          | 16 (5/11)  | 49 [30-75] (median) | AZA (9), colchicine (4), CSA (14), doxepin (6), H1-AH (16), HCQ (6), IVIG (3),<br>montelukast (12), sedating AH (13), Sul/Dapsone (7) | Unk [10-15 mg]                        |

|                        |    |                                 |                                 |     |             |          |       |                                                                                               |       |
|------------------------|----|---------------------------------|---------------------------------|-----|-------------|----------|-------|-----------------------------------------------------------------------------------------------|-------|
| Sagi, 58<br>(2011)     | Ur | Retrospective CS                | MTX                             | 4.5 | 8.3         | 8 (2/6)  | 8     | AH (8), colchicine (Unk), dapsone (Unk), doxepin (Unk), IV hydrocortisone (4), Or<br>Pred (1) | 15 mg |
| Sharma, 152<br>(2014)  | Ur | RCT                             | <u>MTX (14)</u><br>Placebo (15) | 3   | 3.5 [0.5-9] | 14 (6/8) | 34.21 | AH (14)                                                                                       | 15 mg |
| AlGhamdi, 37<br>(2013) | Vi | Prospective CS                  | MTX                             | 6   | 9           | 6 (4/2)  | 29    | Unk                                                                                           | 25 mg |
| Singh, 47<br>(2015)    | Vi | Randomized<br>comparative study | <u>CST (25)</u><br>MTX (25)     | 8   | Unk         | 25       | 38.6  | Unk                                                                                           | 10 mg |

~ 4 patients (AB 3, AZA 1, CSA 1) received concomitant systemic medication. Since this number is low compared to the total number of patients, we still included this study.

§ This study reported an inconsequent number of patients; 26 patients participated, but from 23 patients AE's were reported and from 19 patients effectiveness was reported.

+ Follow-up study from Schram (2011)

± Follow-up study from Zulian (2011)

AA: Alopecia areata, AB: Antibiotics, Ac: Acitretin, AD: Atopic dermatitis, AH: Antihistamines, All CE: Allergic Contact Eczema, AO: Adult onset, AZA: Azathioprine, BP: Bullous pemphigoid, CCS: Case-control study, Co: Cohort study, CP: Cyclophosphamide, CQ: Chloroquine, Cry: Cryotherapy, CS: Case series, CSA: Ciclosporin, CST: Corticosteroids, D: Day, DM: Dermatomyositis, DPCP: Diphenciprone, DTN: Dithranol, E: Eczema, EF: Eosinophilic fasciitis, Em: Emollients, ENL: Eythema Nodosum Leprosum, ET: Etretinate, FA: Folic acid, G: Gram, GA: Granuloma Annulare, GD: Gastroduodenal, GCS: Glucocorticosteroids, GI: Gastrointestinal, GPA: Granulomatosis with polyangiitis (Wegener’s granulomatosis), HCQ: Hydroxychloroquine, ICS: Intravenous corticosteroids, IL: Intralesional, IV: Intravenous, IVIG: Intravenous immunoglobulin, LE: Lupus erythematosus, LP: Lichen planus, LPP: Lichen planopilaris, LS: Lichen Sclerosus (extra genital), LyP: Lymphomatoid papulosis, M: Morphea, mg: milligram, MMF: Mycophenolate Mofetil, MNX: Minoxidil, Mo: Month, MP: Methylprednisolone, MPA: Mycophenolate acid, MPP: Methylprednisolone pulse, MTX: Methotrexate, NA: Not applicable, NB: Narrow band, Or: Oral, OCS: Oral Corticosteroids, Pa: Panniculitis, PD: Papular Dermatitis, Ped: Pediatric, PF: Pemphigus Foliaceus, epidemical, fogo selvage, PPP: Palmoplantar pompholyx, PN: Prurigo Nodularis, Pred: Prednisone, Pr: Prurigo, PrD: Parthenium Dermatitis, PRP: Pityriasis rubra pilaris, Pt: Patient, PT: Phototherapy, Pts: Patients, PUVA: Psoralen – ultraviolet-A, PV: Pemphigus vulgaris, RCT: Randomized Controlled Trial, Sar: Sarcoidosis, Sc: Subcutaneous, SCS: Systemic corticosteroids, Scl: Scleroderma, SD: Sclerodema diabeticorum, Sul: Sulfasalazine, SS: Systemic sclerosis, T: Topical, TA: Topical agents, TAC: Tacrolimus, TCA: Triamcinolone, TCI: Topical calcineurin inhibitor, TCS: Topical corticosteroids, Unk: Unknown, Ur: Urticaria, UVA: Ultraviolet-A, UVB: Ultraviolet-B, Vi: Vitiligo, Vit: Vitamin, Wk: Week



Table S2 Efficacy/effectiveness of all included studies

| Author, reference<br>(year of<br>publication) | Disease | Efficacy/ effectiveness~                                                                                                        | Time to<br>effect, wk | Mean duration of<br>remission [range], mo | Concomitant medication (no. of<br>patients)                 | AE's (no. of events)                                                                                                                                                                     | SAE's (no. of events) |
|-----------------------------------------------|---------|---------------------------------------------------------------------------------------------------------------------------------|-----------------------|-------------------------------------------|-------------------------------------------------------------|------------------------------------------------------------------------------------------------------------------------------------------------------------------------------------------|-----------------------|
| Chartaux, 74 (2010)                           | AA      | Complete hair regrowth:<br>MTX+CST: 12/19<br>MTX: 8/14                                                                          | 12                    | Unk                                       | CST 10-20 mg/d (19)                                         | Elevated liver enzymes (4), lymphocytopenia (1), persistent nausea (2) ( <b>patients</b> )                                                                                               | None                  |
| Alkeraye, 77 (2017)                           | AA      | Responders ( $\geq$ 50% regrowth):<br>9/14 (Pred + MTX), 2/6 (pred)                                                             | 4                     | Unk                                       | Pred 500 mg/d; 3 ds/mo                                      | None                                                                                                                                                                                     | None                  |
| Anuset, 78 (2016)                             | AA      | Total hair regrowth (100%): 15/26<br>Partial hair regrowth (50-100%): 6/26<br>Regrowth failure (<50%): 5/26                     | 12                    | 27 [6-72]                                 | Pred 20 mg/d (23), "prophylactic<br>osteoporosis treatment" | Acne (2), elevated liver enzymes (4), pneumocystois pneumonia<br>(1), steroidinduced cataract (1), weight gain (4) [both MTX and Pred] ( <b>patients</b> )                               | None                  |
| Chong, 79 (2017)                              | AA      | Good response ( $\geq$ 50% hair regrowth): 6/14                                                                                 | 8                     | Unk                                       | OCS 10 mg/kg/d, 3 d/mo for 3<br>mo                          | Abdominal discomfort (Unk)                                                                                                                                                               | None                  |
| Droitcourt, 60<br>(2012)                      | AA      | Total or partial regrowth (after 12 mo): 14/20<br>Total regrowth (after 18 mo): 10/14<br>Partial regrowth (after 18 mo): 4/14   | 10 (median)           | Unk                                       | IV Pred 500 mg/d, 3 d/mo for 3<br>mo, FA 5 mg               | Nausea (2), neutropenia (1) ( <b>patients</b> )                                                                                                                                          | None                  |
| Firooz, 80 (2013)                             | AA      | Regrowth of terminal hairs: 8/10                                                                                                | 7.2                   | Unk                                       | OCS (10)                                                    | Acne (2), amenorrhea (1), anemia (1), herpes infection (1), hypertension (1), muscle cramp<br>(2), weight gain (1)                                                                       | None                  |
| Hammer- schmidt,<br>75 (2014)                 | AA      | >50% regrowth: 21/31                                                                                                            | Unk                   | 6.3 mo (3)                                | IL CST, MNX, SCS                                            | Elevated liver enzymes (2), leukopenia (3), nausea, epigastric pain and diarrhoea (3)                                                                                                    | None                  |
| Joly, 81 (2006)                               | AA      | Complete regrowth:<br>Pred+MTX: 11/16<br>MTX: 3/6                                                                               | Unk                   | Unk                                       | Or Pred 10-20 mg/d (16)                                     | Abdominal pain, nausea, vomiting (1)                                                                                                                                                     | Unk                   |
| Landis, 82 (2017)                             | AA      | Complete response: 4/11                                                                                                         | Unk                   | Unk                                       | Pred (13)                                                   | Unk                                                                                                                                                                                      | Unk                   |
| Lim, 68 (2017)                                | AA      | Complete response (100% regrowth): 14/29<br>Partial response 75-90% regrowth: 12/29<br>Poor response <50% regrowth: 3/29        | Unk                   | Unk                                       | FA (29)                                                     | Elevated liver enzymes (3), gastrointestinal discomfort (3), lymphopenia (1), reactivation of<br>pulmonary tuberculosis (1)                                                              | Unk                   |
| Lucas, 59 (2016)                              | AA      | Partial response 75-99% regrowth: 2/5<br>Poor response 25-49% regrowth: 1/5<br>No change or further loss: 2/5                   | Unk                   | Unk                                       | FA (5)                                                      | Nausea (1)                                                                                                                                                                               | None                  |
| Royer, 83 (2011)                              | AA      | Regrowth >50%: 5/14<br>Regrowth <50%: 9/14                                                                                      | 12-27                 | Unk                                       | SCS (8)                                                     | Herpes zoster (1), nausea (1)                                                                                                                                                            | None                  |
| Thi Van, 76 (2019)                            | AA      | Good response: 23/38<br>Medium response: 9/38<br>Poor response: 6/8                                                             | 4                     | Unk                                       | Pred 24 mg/d, 3 ds/week (38)                                | None                                                                                                                                                                                     | Unk                   |
| Vano-Galvan, 84<br>(2017)                     | AA      | Complete response >75% regrowth:<br>MTX: 0/10<br>MTX+Pred: 3/5<br>Partial response <75% regrowth:<br>MTX: 5/10<br>MTX+Pred: 1/5 | 6.8 - 12              | Unk [6.3-6.8]                             | Pred 0.5-1 mg/kg/d (5)                                      | Elevated liver enzymes (4), weight gain (3)                                                                                                                                              | None                  |
| Anderson, 87<br>(2019)                        | AD      | IGA 0-5:<br>6-9 months FU: 2.9                                                                                                  | < 8                   | Unk                                       | TCS (51), nonsteroidal topicals<br>(29)                     | Blurry vision (3), cellulitis (2), eczema herpeticum (1), fatigue (14), folliculitis (1), GI<br>discomfort (17), headaches (9), low haematocrit and hemoglobin (2), molluscum (8), mouth | Unk                   |

|                         |    |                                                                                                                          |                              |     |                                     |                                                                                                                                                                                                                                                                                                                                                                                                                                                                                                                                                                                                                                                                                                                          |                                                                                                                                                    |
|-------------------------|----|--------------------------------------------------------------------------------------------------------------------------|------------------------------|-----|-------------------------------------|--------------------------------------------------------------------------------------------------------------------------------------------------------------------------------------------------------------------------------------------------------------------------------------------------------------------------------------------------------------------------------------------------------------------------------------------------------------------------------------------------------------------------------------------------------------------------------------------------------------------------------------------------------------------------------------------------------------------------|----------------------------------------------------------------------------------------------------------------------------------------------------|
|                         |    | 12-15 months FU: 2.4<br>Final visit: 2.7                                                                                 |                              |     |                                     | sores (3), ocular herpes simplex (1), ringworm (1), staphylococcus aureus superinfection (22), transient elevated liver enzymes (5), verruca vulgaris (1) <b>(patients)</b>                                                                                                                                                                                                                                                                                                                                                                                                                                                                                                                                              |                                                                                                                                                    |
| Baum, 97 (2019)         | AD | Disease severity 6 Months:<br>mild 20; moderate 7; severe 3                                                              | Unk                          | Unk | FA 5 mg/d, CST                      | GI discomfort (3), alopecia (1)                                                                                                                                                                                                                                                                                                                                                                                                                                                                                                                                                                                                                                                                                          | None                                                                                                                                               |
| Delcasso, 96 (2018)     | AD | SCORAD 50:<br>After 3 months: 7/14<br>After 6 months: 5/8<br>After 12 months: 9/12                                       | Unk                          | Unk | EM +/- TCS (20)                     | GI discomfort (5), headache/weakness (5), hepatic cytolysis (3), infectious (3), lymphopenia (3) <b>(patients)</b>                                                                                                                                                                                                                                                                                                                                                                                                                                                                                                                                                                                                       | None                                                                                                                                               |
| Deo, 62 (2014)          | AD | >50% persistent improvement: 75% <b>(patients)</b><br>SCORAD reduction (n=9): 16 points                                  | 8                            | Unk | FA 5 mg, 2d/wk, TCS, SAB or SCS (3) | Elevated liver enzymes (4), nausea (4)                                                                                                                                                                                                                                                                                                                                                                                                                                                                                                                                                                                                                                                                                   | Serious pyelonephritis needing hospitalization (1), viral-induced exacerbation of asthma needing hospitalization (1)                               |
| Dvorakova~, 86 (2017)   | AD | Reduction disease severity: IGA decrease 2.35                                                                            | 11.3                         | Unk | AB (3), AZA (1), CSA (1), OCS (7)   | Anemia, elevated liver enzymes, fatigue (17), hyperbilirubinemia, lymphocytopenia, nausea/vomiting/abdominal pain (14), neutropeania                                                                                                                                                                                                                                                                                                                                                                                                                                                                                                                                                                                     | Bullous impetigo (1), chest tightness/wheezing (1), hospitalization for community acquired pneumonia (1), poststreptococcal glomerulonephritis (1) |
| El-Khalawany, 64 (2013) | AD | MEAN absolute SCORAD reduction:<br>MTX: 26.3 (12 wks), 24.9 (24 wks)<br>CSA: 25.0 (12 wks), 21.0 (24 wks)                | 3-5                          | 5   | FA (20)                             | Abnormal renal function test (1), anemia (6), abnormal liver enzymes (5), fatigue (6), fever (1), flu-like symptoms (1), GI discomfort (9), headache (3), leukopenia (2),nausea and vomiting (4), Or ulceration (4), pancytopenia (1) <b>(patients)</b>                                                                                                                                                                                                                                                                                                                                                                                                                                                                  | Unk                                                                                                                                                |
| Gerbens+, 88 (2018)     | AD | MEAN absolute SCORAD reduction:<br>MTX: 32.1<br>AZA: 32.1                                                                | Unk                          | Unk | AB, TCI, TCS, OCS                   | Blood and lymphatic system disorders (14), cardiovascular disorders (6), ear and labyrinth disorders (4), gastrointestinal disorders (31), general and administration site conditions (25), hepatobiliary disorders (19), immune system disorders (1), infections (86), injury, poisoning and procedural complications (9), metabolism and nutrition disorders (1), musculoskeletal and connective tissue disorders (21), neoplasms (6), nervous system disorders (22), psychiatric disorders (3), renal and urinary disorders (6), reproductive system and breast disorders (2), respiratory, thoracic and mediastinal disorders (19), skin and subcutaneous tissue disorders (30), surgical and medical procedures (2) | Cholera (1), exacerbation of AD (1), myocardial infarction (2), respiratory problems (2), social reasons after trauma (1)                          |
| Goujon, 94 (2006)       | AD | >70% improvement: 13/20                                                                                                  | 2-8                          | Unk | TCI, TCS                            | Elevated liver enzymes (2), lymphopenia (1), nausea (4)                                                                                                                                                                                                                                                                                                                                                                                                                                                                                                                                                                                                                                                                  | Unk                                                                                                                                                |
| Goujon, 29 (2017)       | AD | SCORAD 50 after 8 weeks:<br>MTX: 4/50<br>CSA: 18/43<br>SCORAD 50 after 24 weeks:<br>MTX: 9/24<br>CSA: 22/31              | Unk                          | Unk | Em, FA 5mg/d (50), TCI, TCS         | Acne/virus papilloma (1), elevated liver enzymes (1), fatigue (6), gastrointestinal disorders (9), headache (1), infections (12), lymphocytopenia (1)                                                                                                                                                                                                                                                                                                                                                                                                                                                                                                                                                                    | None                                                                                                                                               |
| Hegazy, 85 (2017)       | AD | Complete response: 8/37                                                                                                  | Unk                          | Unk | Unk                                 | Unk side effects (3)                                                                                                                                                                                                                                                                                                                                                                                                                                                                                                                                                                                                                                                                                                     | Unk                                                                                                                                                |
| Ho, 22 (2018)           | AD | Excellent control: >75%                                                                                                  | 12-24                        | Unk | Em, TCI, TCS                        | Unk                                                                                                                                                                                                                                                                                                                                                                                                                                                                                                                                                                                                                                                                                                                      | Unk                                                                                                                                                |
| Knopfel, 57 (2018)      | AD | Complete/almost complete clearance: 10/28<br>Marked improvement: 13/28<br>Mild improvement: 4/28<br>No improvement: 1/28 | Unk                          | Unk | FA (28), OCS (1), TCS (28),         | Elevated liver enzymes (5), headache (1), nausea (6), vomiting (1)                                                                                                                                                                                                                                                                                                                                                                                                                                                                                                                                                                                                                                                       | None                                                                                                                                               |
| Lyakhovitsky, 55 (2010) | AD | Responders: 16/20                                                                                                        | 9.95 (mean),<br>2-12 (range) | Unk | FA (20), SAH, TCS                   | Elevated liver enzymes (5), nausea (5), peripheral neuropathy (1)                                                                                                                                                                                                                                                                                                                                                                                                                                                                                                                                                                                                                                                        | None                                                                                                                                               |

|                        |        |                                                                                                                  |     |             |                                                                                                            |                                                                                                                                                                                                                                                                                                                                                                                                                                                                                                                                                                                                                          |                                                                              |
|------------------------|--------|------------------------------------------------------------------------------------------------------------------|-----|-------------|------------------------------------------------------------------------------------------------------------|--------------------------------------------------------------------------------------------------------------------------------------------------------------------------------------------------------------------------------------------------------------------------------------------------------------------------------------------------------------------------------------------------------------------------------------------------------------------------------------------------------------------------------------------------------------------------------------------------------------------------|------------------------------------------------------------------------------|
| Mittal, 93 (2011)      | AD     | Excellent response: 7/15<br>Good response: 3/15<br>Poor response: 5/15                                           | Unk | Unk         | SCS, TCS                                                                                                   | None                                                                                                                                                                                                                                                                                                                                                                                                                                                                                                                                                                                                                     | None                                                                         |
| Politek, 98 (2016)     | AD     | PGA1, good effect: 38/89<br>PGA2, moderate effect: 28/89<br>PGA3, failure of treatment: 12/89<br>Excluded: 11/89 | Unk | Unk         | Prednisolone 10-30 mg/d (26)                                                                               | Aggravation of rosacea (1), alopecia (1), concentration problems (1), condylomata acuminata (1), depressive discomfort (1), elevated liver enzymes (2), fatigue (4), folliculitis (1), flu-like discomfort (1), gastrointestinal complaints (6), headache (3), pneumonia (1), shortness of breath (1), vision changes (1)                                                                                                                                                                                                                                                                                                | Unk                                                                          |
| Purvis, 52 (2019)      | AD     | A lot better: 23/43<br>Slightly better: 2/43<br>No change: 5/43<br>Excluded: 13/43                               | Unk | 24 (median) | AB, AH, Em, FA 5 mg (43), TCS                                                                              | Cataracts (1), gastrointestinal upset (4)                                                                                                                                                                                                                                                                                                                                                                                                                                                                                                                                                                                | None                                                                         |
| Rahman, 91 (2014)      | AD     | Good - excellent response: 23/30<br>No response: 7/30                                                            | 12  | Unk         | Unk                                                                                                        | Unk                                                                                                                                                                                                                                                                                                                                                                                                                                                                                                                                                                                                                      | Unk                                                                          |
| Roekevisch+, 43 (2018) | AD     | SCORAD reduction (ITT)<br>MTX: 37.8<br>AZA: 32.6                                                                 | Unk | Unk         | FA, weekly 5 mg (17)                                                                                       | Blood and lymphatic system disorders (11), eye disorders (4), gastrointestinal disorders (26), general disorders and administration site conditions (22), hepatobiliary disorders (11), infections (52), injury, poisoning, and procedural complications (4), musculoskeletal and connective tissue disorders (16), neoplasm benign, malignant, and unspecified (3), nervous system disorders (2), renal and urinary disorders (6), reproductive system and breast disorders (2), respiratory, thoracic, and mediastinal disorders (1), skin and subcutaneous tissue disorders (26), surgical and medical procedures (2) | Exacerbations AD (1), hospitalization because of psychiatric comorbidity (1) |
| Schram, 44 (2011)      | AD     | MEAN absolute SCORAD reduction:<br>MTX: 22.8<br>AZA: 21.7                                                        | Unk | Unk         | FA 5 mg (20)                                                                                               | Abnormalities in blood count (6), exacerbation of their eczema (3), gastrointestinal complaints (11), infections (14), increased liver enzymes (7)                                                                                                                                                                                                                                                                                                                                                                                                                                                                       | None                                                                         |
| Shah, 31 (2018)        | AD     | Excellent improvement: >75% 38/41<br>Good improvement: 50-75% 2/41<br>Partial improvement: 25-50% 1/41           | 4-6 | Unk         | AB (14), CSA 150mg (1), FA 5mg/d, 6ds/week (41), IM TCA (17), tapering doses of Pred (2), valacyclovir (1) | Decreased hemoglobin (1), transient decrease in platelets (1), elevated liver enzymes (8), fatigue (3), nausea (5)                                                                                                                                                                                                                                                                                                                                                                                                                                                                                                       | None                                                                         |
| Syed, 92 (2009)        | AD     | EASI50:<br>MTX: 30/30<br>Placebo: 0/30                                                                           | Unk | Unk         | Unk                                                                                                        | None                                                                                                                                                                                                                                                                                                                                                                                                                                                                                                                                                                                                                     | Unk                                                                          |
| Taieb, 90 (2019)       | AD     | IGA decrease at least 2 points: 14/26                                                                            | Unk | Unk         | SCS, TCS                                                                                                   | Gastrointestinal discomfort (1), elevated liver enzymes (1), bone marrow suppression (3), mild fatigue (1)                                                                                                                                                                                                                                                                                                                                                                                                                                                                                                               | Unk                                                                          |
| Vedie, 95 (2016)       | AD     | Responders: 15/28<br>Non-responders: 12/28<br>Lost to follow-up: 1/28                                            | Unk | Unk         | AZA (7)                                                                                                    | Asthenia (3), digestive disorders (4), hepatic dysfunction (7), infections (4), lymphopenia (2)                                                                                                                                                                                                                                                                                                                                                                                                                                                                                                                          | Folliculitis (1), herpetic recurrences (1)                                   |
| Weatherhead, 89 (2007) | AD     | MEAN SASSAD reduction: 19 units                                                                                  | 3   | Unk         | Em, TCI, TCS                                                                                               | Elevated liver enzymes (2), herpes simplex (1), nausea (2)                                                                                                                                                                                                                                                                                                                                                                                                                                                                                                                                                               | None                                                                         |
| Zoller, 70 (2008)      | AD     | Complete remission: 6/9<br>Significant improvement: 3/9                                                          | 4-8 | Unk         | Em, FA (9)                                                                                                 | Numbness (1)                                                                                                                                                                                                                                                                                                                                                                                                                                                                                                                                                                                                             | Unk                                                                          |
| Roberts, 46 (2010)     | AD, NE | Clear: 16/25<br>Almost clear: 3/25<br>Ongoing: 3/25<br>Failed: 1/25<br>Lost to follow up: 2/25                   | 42  | Unk         | FA, weekly 5 mg (25)                                                                                       | Generalized exanthema (1), lethargy (1), mild lethargy (2), nausea (4), transient mouth ulceration (1)                                                                                                                                                                                                                                                                                                                                                                                                                                                                                                                   | None                                                                         |

|                         |        |                                                                                                             |       |             |                                                                                 |                                                                                                                                                                                                                                                                                                                                                                                                                                      |                                                                                                                   |
|-------------------------|--------|-------------------------------------------------------------------------------------------------------------|-------|-------------|---------------------------------------------------------------------------------|--------------------------------------------------------------------------------------------------------------------------------------------------------------------------------------------------------------------------------------------------------------------------------------------------------------------------------------------------------------------------------------------------------------------------------------|-------------------------------------------------------------------------------------------------------------------|
| Patel, 154 (2018)       | All CE | Complete clearance: 6/32<br>Partial clearance: 19/32<br>Failure: 6/32                                       | Unk   | Unk         | Unk                                                                             | Anemia (5), elevated creatinine (3), elevated liver enzymes (10), fatigue (5), gastrointestinal discomfort (7), leukopenia (2), thrombocytopenia (1)                                                                                                                                                                                                                                                                                 | None                                                                                                              |
| Kalyoncu, 153 (2016)    | AO SD  | Remission with treatment:<br>CST+MTX: 85/97<br>CST+MTX+HCQ: 68/81                                           | Unk   | 18 (median) | CST 43.9 mg/d                                                                   | Unk                                                                                                                                                                                                                                                                                                                                                                                                                                  | Unk                                                                                                               |
| Bakker, 48 (2013)       | BP     | Clinical remission: 5/6                                                                                     | 16    | Unk         | FA 5mg/week (6)                                                                 | Unk                                                                                                                                                                                                                                                                                                                                                                                                                                  | None                                                                                                              |
| Bara, 100 (2003)        | BP     | Complete remission: 14/16                                                                                   | Unk   | 3 (in 1 pt) | 0.5% clobetasol, max 20 g/d (10)                                                | Anemia, thrombopenia, colon ulcerations, pancytopenia ( <b>events</b> )                                                                                                                                                                                                                                                                                                                                                              | None                                                                                                              |
| Dereure, 101 (2002)     | BP     | Maintenance of complete clinical response: 17/18                                                            | Unk   | 7.8         | TCS                                                                             | Decrease in hemoglobin (6), weary (5) ( <b>patients</b> )                                                                                                                                                                                                                                                                                                                                                                            | None                                                                                                              |
| Du-Thanh, 99 (2011)     | BP     | Complete clinical remission:<br>TCS+MTX: 70/70<br>Maintenance of complete clinical remission:<br>MTX: 53/70 | Unk   | 2.5 [0.5-7] | Superpotent TCS (70)                                                            | Anemia (7), asthenia (1), depression (1), GD ulceration (3), interstitial pneumopathy (1), leukopenia (2), liver cytolysis (2), Or ulceration (2), pancytopenia (1), pulmonary embolism (1), respiratory tract infection (1), thrombocytopenia (2)                                                                                                                                                                                   | Death (6, 1 MTX related due to respiratory tract infection in a setting of MTX related pancytopenia). Other: Unk. |
| Heilborn, 63 (1999)     | BP     | Marked and rapid decrease in disease activity: 11/11                                                        | <1    | >24         | FA (3), TCS                                                                     | Anemia (1), nausea and anorexia (1), pyoderma (2)                                                                                                                                                                                                                                                                                                                                                                                    | Unk                                                                                                               |
| Kjellman, 102 (2008)    | BP     | Remission rate:<br>MTX: 26/31<br>MTX+pred: 13/37                                                            | 44-80 | Unk         | Pred (37)                                                                       | Anemia (1), alveolitis (1), elevated liver enzymes (1) GI discomfort (2)                                                                                                                                                                                                                                                                                                                                                             | Unk                                                                                                               |
| Kremer, 104 (2017)      | BP     | Disease control: 6/6                                                                                        | Unk   | Unk         | CST (6)                                                                         | Unk                                                                                                                                                                                                                                                                                                                                                                                                                                  | Unk                                                                                                               |
| Kwatra, 36 (2013)       | BP     | Complete remission: 15/16                                                                                   | 15.2  | Unk         | FA 1 mg/d, tapered pred 20-60 mg/d                                              | GI intolerance (1), mild nausea and dyspepsia (2), worsening of anemia (1)                                                                                                                                                                                                                                                                                                                                                           | None                                                                                                              |
| Paul, 104 (1994)        | BP     | Clearance and significant decrease in the need for systemic corticosteroids: 5/8                            | 4-88  | Unk         | OCS (8)                                                                         | Anemia (1), nausea (1), thrombocytopenia (1)                                                                                                                                                                                                                                                                                                                                                                                         | None                                                                                                              |
| Click, 107 (2013)       | DM     | Substantial clearing/near response: 3/8                                                                     | Unk   | Unk         | TCS (8)                                                                         | Alopecia (1), leukopenia (1)                                                                                                                                                                                                                                                                                                                                                                                                         | None                                                                                                              |
| Hornung, 28 (2012)      | DM     | CDASI decrease: 8.6                                                                                         | Unk   | Unk         | FA 5mg/d (11), Pred 5-20 mg/d (9)                                               | Abcess on injection place (1)                                                                                                                                                                                                                                                                                                                                                                                                        | Herpes encephalitis (1), pancytopenia (1), urothelial carcinoma (1)                                               |
| Kasteler, 26 (1997)     | DM     | CST sparing effect: 10/13                                                                                   | Unk   | Unk         | Or Pred (10)                                                                    | Mild malaise (2), transient nausea (6)                                                                                                                                                                                                                                                                                                                                                                                               | Unk                                                                                                               |
| Ramanan, 106 (2005)     | DM     | Median time to discontinuation prednisone:<br>MTX: 10 mo<br>Control: 27 mo                                  | Unk   | Unk         | AZA (1), CSA (1), Cyclophosphamide (1), HCQ (6), IVIg (15), Pred 2m/g/kg/d (31) | Cellulitis of the metacarpophalangeal joint (1), elevated liver enzymes (6), fungal vaginitis (1), herpes zoster (1)                                                                                                                                                                                                                                                                                                                 | Unk                                                                                                               |
| Ruperto, 105 (2016)     | DM     | PRINTO20 Pred: 51%<br>Pred+CSA: 70%<br>Pred+MTX: 72%                                                        | Unk   | Unk         | Pred 2 mg/kg, after induction phase tapered to 0.25 mg/kg (46)                  | Cardiac disorders (1), endocrine disorders (9), eye disorders (3), gastrointestinal disorders (9), general disorders and administration site conditions (2), infections and infestations (14), investigations (6), metabolism and nutrition disorders (4), musculoskeletal and connective tissue disorders (4), nervous system disorders (2), psychiatric disorders (4), skin and subcutaneous disorders (9), vascular disorders (1) | Dermohypodermatitis (1), paronychia (1)                                                                           |
| Zieglschmid, 108 (1995) | DM     | Improvement of cutaneous disease: 9/10                                                                      | Unk   | Unk         | OCS, Pred, sunscreens, TCS                                                      | Alopecia (1), gastrointestinal distress (2), abnormal liver biopsy (2), lung disease (1), leukopenia (1), mild hepatic fibrosis (2), stomatitis (3)                                                                                                                                                                                                                                                                                  | Unk                                                                                                               |
| Chen, 109 (2016)        | E      | Control of disease: 15/41                                                                                   | Unk   | Unk         | Unk                                                                             | Elevated liver enzymes (3), elevated creatinine (3), increased procollagen type III aminoterminal peptide (3), nausea (4) ( <b>patients</b> )                                                                                                                                                                                                                                                                                        | None                                                                                                              |
| Shaffrali, 110 (2003)   | E      | Successful response: 4/5<br>No successful response: 1/5                                                     | Unk   | Unk         | Prednisolone 5 mg/d (1)                                                         | Abdominal pain (1), flu-like illness (1), liver enzyme elevation (1)                                                                                                                                                                                                                                                                                                                                                                 | Unk                                                                                                               |
| Tétart, 49 (2011)       | E      | Complete response: no skin-lesions: 11/15<br>Partial response: still skin-lesions 4/15                      | Unk   | Unk         | FA 10 mg/week (12)                                                              | Malaise (1), renal insufficiency (1), stomach aches (2), transient lymphopenia (1)                                                                                                                                                                                                                                                                                                                                                   | Unk                                                                                                               |
| Berianu, 111 (2015)     | EF     | Complete remission: 9/16                                                                                    | 26    | 27.1 [7-36] | Pred (15)                                                                       | Unk                                                                                                                                                                                                                                                                                                                                                                                                                                  | Unk                                                                                                               |

|                        |         |                                                                                                                                                   |          |                 |                                                          |                                                                                                                                                                   |      |
|------------------------|---------|---------------------------------------------------------------------------------------------------------------------------------------------------|----------|-----------------|----------------------------------------------------------|-------------------------------------------------------------------------------------------------------------------------------------------------------------------|------|
| Lebeaux, 112 (2012)    | EF      | Complete remission: 4/12                                                                                                                          | Unk      | Unk             | Pred (12)                                                | Unk                                                                                                                                                               | Unk  |
| Mertens, 45 (2016)     | EF      | MEDIAN difference modified skin score: 9                                                                                                          | Unk      | Unk             | Analgesics, antiemetics, FA 5-25 mg/week, SCS ≤15 mg/d   | Alopecia (4), gastrointestinal discomfort (9), mild stomatitis (5)                                                                                                | None |
| Kroft, 71 (2009)       | EF/M/SS | Clinical improvement:<br>MTX: 38/47<br>MTX+CS: 11/11                                                                                              | Unk      | Unk             | FA (not routinely and exact dose not indicated), SCS (6) | Unk                                                                                                                                                               | Unk  |
| Hossain, 155 (2013)    | ENL     | Persistent remission: 9/9                                                                                                                         | 4-8      | Unk             | Pred tapered from 30-40 mg/d (9)                         | Crusted scabies (1), extensive pityriasis versicolor (1), facial swelling (1), multiple folliculitis (2), weight gain (1)                                         | None |
| Naka, 53 (2018)        | GA      | Complete resolution: 3/11<br>Partial resolution: 4/11<br>No improvement: 4/11                                                                     | ≥4       | Unk             | FA (11)                                                  | Diarrhoea (2), gastrointestinal upset (2), hair loss (2)                                                                                                          | None |
| Politiek, 156 (2016)   | HE      | PGA1, good effect: 14/42<br>PGA2, moderate effect: 14/42<br>PGA3, failure of treatment: 9/42<br>Excluded: 5/42                                    | Unk      | Unk             | OCS (7)                                                  | Fatigue (1), gastrointestinal complaints (3), headache (2), hematoma (1), suspicion of an allergic reaction to folic acid or MTX (1), urinary tract infection (1) | Unk  |
| Arfi, 115 (1995)       | LE      | Improvement: 16/16                                                                                                                                | Unk      | Unk             | Pred 5-30 mg                                             | Elevated liver enzymes (2) <b>(patients)</b>                                                                                                                      | None |
| Böhm, 33 (1998)        | LE      | Improvement: 10/12<br>Complete response: 6/12<br>Partial response: 4/12                                                                           | 2-6      | 5-24 (in 5 pts) | GCS systemic (6), TCS (3)                                | Elevated liver enzymes (3) <b>(patients)</b>                                                                                                                      | None |
| Böhm, 116 (2003)       | LE      | Complete response: 15/22<br>Clinical improvement: 21/22                                                                                           | 8 [2-22] | Unk             | FA 5 mg/d (Unk)                                          | Elevated liver enzymes and vomitus (10)                                                                                                                           | None |
| Carneiro, 113 (1999)   | LE      | Presence of cutaneous lesions:<br>MTX: 3/20<br>Placebo: 16/21                                                                                     | Unk      | Unk             | SCS <0.5 mg/kg/d                                         | Diarrhoea (5), dyspepsia (9), elevated liver enzymes (31), infection (4), nausea (6), Or ulcer (6), urticaria (1), weakness (5)                                   | Unk  |
| Fruchter\$, 117 (2017) | LE      | ≥50% improvement: 10/19                                                                                                                           | Unk      | Unk             | Unk                                                      | Adverse events, details unknown (6)                                                                                                                               | Unk  |
| Gansauge, 54 (1997)    | LE      | Resolve of cutaneous lesions: 8/10                                                                                                                | Unk      | Unk             | Pred, FA                                                 | Elevated liver enzymes (2), general malaise (4) <b>(patients)</b>                                                                                                 | None |
| Islam, 114 (2012)      | LE      | Number of patients with skin rash:<br>MTX: 0/13<br>CQ: 3/19                                                                                       | 24       | Unk             | Unk                                                      | Anorexia and nausea (7), elevated liver enzymes (2)                                                                                                               | None |
| Kan, 118 (2016)        | LE      | Both the MTX and AZA clusters appeared to have better clinical outcomes and lower total medical costs relative to CST monotherapy.                | Unk      | Unk             | HCQ (Unk), OCS (Unk)                                     | Unk                                                                                                                                                               | Unk  |
| Wenzel, 119 (2005)     | LE      | Significant clinical improvement in CLAI: 42/43                                                                                                   | 0.5-2    | Unk             | Antimalarials (19), low dose prednisolone (18)           | Elevated liver enzymes (23), fatigue (11), GI discomfort (22), infections (2), minor hair loss (2)                                                                | None |
| Chauhan, 120 (2018)    | LP      | Mean CSS reduction (%):<br>MTX: 53.31<br>MTX + TCA: 83.53<br>Mean VAS reduction (%):<br>MTX: 65.31<br>MTX + TCA: 93.29<br>Mean QLIQ reduction (%) | 16       | Unk             | TCA 0.1% Or paste 3 times/d                              | Anemia (1), nausea (1)                                                                                                                                            | None |

|                                    |                   |                                                                                                                      |                             |              |                                          |                                                                                                                                             |                                |
|------------------------------------|-------------------|----------------------------------------------------------------------------------------------------------------------|-----------------------------|--------------|------------------------------------------|---------------------------------------------------------------------------------------------------------------------------------------------|--------------------------------|
|                                    |                   | MTX: 80.26<br>MTX + TCA: 96.00                                                                                       |                             |              |                                          |                                                                                                                                             |                                |
| Ilyas, 39 (2016)                   | LP                | >50% clearance of cutaneous lesions: 35/55                                                                           | Unk                         | Unk          | FA 1mg/d (55)                            | Elevated liver enzymes (Unk), leukopenia (Unk), nausea (4)                                                                                  | Unk                            |
| Kanwar, 38 (2013)                  | LP                | Complete remission: 14/24                                                                                            | 2                           | Unk [3-Unk]  | FA 5 mg/d, 2 D/Wk                        | Deranged liver function abnormality (4), marginal decrease in hemoglobin (6), reduced appetite (2)                                          | Unk                            |
| Lajevardi, 27 (2016)               | LP                | TS score reduction: 2.06                                                                                             | Unk                         | Unk          | FA 1mg/d (18)                            | Epigastric pain (1), nausea (1), pityriasis rosea (1)                                                                                       | Elevation of liver enzymes (1) |
| Malekzad, 32 (2012)                | LP                | Excellent improvement >75%: 12/15<br>Mild improvement <75%: 3/15<br>Unresponsive: 1/15                               | 2                           | 6            | Em, FA 1 mg/d (18), SAH                  | Elevated liver enzymes (1), anemia (1)                                                                                                      | None                           |
| Torti, 121 (2007)                  | LP                | Substantial improvement: >75% clear 10/18<br>Moderate improvement 25-75% clear: 6/18<br>No response <25% clear: 2/18 | Unk                         | Unk          | Systemic antifungals, TCS, TAC           | Unk                                                                                                                                         | Unk                            |
| Turan, 122 (2009)                  | LP                | Complete response: 10/11                                                                                             | 4                           | Unk          | Unk                                      | Fatigue (1), nausea (1)                                                                                                                     | Unk                            |
| Kortekangas-Savolainen, 123 (2007) | LP, vulvovagina 1 | Long-term symptom relief: 6/6                                                                                        | Unk                         | 6            | TCS (3)                                  | Hair loss (1), herpes simplex (1)                                                                                                           | Unk                            |
| Babahosseini, 124 (2019)           | LPP               | Complete responders: 10/26<br>Partial responders: 12/26<br>Non-responders: 4/26                                      | 9                           | Unk          | TCS (26)                                 | Anemia (1), dizziness (1), ecchymosis (1), edema (1), erythema (2), fatigue (1), headache (1), hypertension (1), LFT rising (7), stupor (1) | Unk                            |
| Bakhtiar, 127 (2018)               | LPP               | Effective: 63/79                                                                                                     | Unk                         | Unk          | Unk                                      | None                                                                                                                                        | None                           |
| Bulbul baskan, 125 (2017)          | LPP               | Clinical response:<br>MTX: 10/10<br>CSA 6/6                                                                          | Unk                         | Unk          | Unk                                      | None                                                                                                                                        | None                           |
| Kerkemeyer, 126 (2018)             | LPP               | Partial improvement: 1/7                                                                                             | Unk                         | Unk          | Unk                                      | Unk                                                                                                                                         | Unk                            |
| Naeini, 128 (2017)                 | LPP               | LPP Activity Index points decrease:<br>MTX: 2.46<br>HCQ: 0.67                                                        | Unk                         | Unk          | None                                     | Elevated liver enzymes (1)                                                                                                                  | None                           |
| Karadag, 163 (2018)                | LS                | Median total clinical score reduction: 11.5                                                                          | Unk                         | Unk          | IV MP 1000mg/d, for 3 D                  | None                                                                                                                                        | None                           |
| Kreuter, 164 (2009)                | LS                | Softening of sclerotic skin and elimination of signs of active disease: 14/15                                        | Unk                         | >6           | MP (15), Pred 5 mg/d (Unk)               | Diabetes Mellitus (2), increase of glucose level (2), mild nausea and headache (3), weight gain (1)                                         | None                           |
| Fernandez-de-Misa, 157 (2018)      | LyP               | Complete response: 25/51                                                                                             | Unk                         | Unk          | Unk                                      | Unk                                                                                                                                         | Unk                            |
| Bulur, 129 (2017)                  | M                 | Clinical improvement: 14/14                                                                                          | Unk                         | Unk          | Unk                                      | None                                                                                                                                        | None                           |
| Christen-Zaech, 35 (2008)          | M                 | Less induration, violaceous coloration: 38/39                                                                        | Unk                         | 6 (in 3 pts) | OCS 0.5 - 1 mg/kg/d (34), FA 1 mg/d (39) | Elevated liver enzymes (1), GI discomfort (5) ( <b>patients</b> )                                                                           | None                           |
| Cox, 61 (2008)                     | M                 | Responders: 8/10                                                                                                     | 3 (median)                  | 6 [2-12]     | SCS 30 mg/kg/d, 3 d/mo (9), FA (10)      | Hyperglycaemia, nausea, varicella zoster (1) ( <b>patients</b> )                                                                            | None                           |
| Fitch, 67 (2006)                   | M                 | Inactive lesions: 16/17                                                                                              | MTX: 24.4 ,<br>MTX+CST: 9.2 | Unk          | FA (19), OCS (12), TCS                   | Elevated glucose (1), elevated liver enzymes (1), weight gain (2), weight gain and mild cushingoid features (several)                       | Unk                            |
| Koch, 41 (2013)                    | M                 | Disease inactivity: 17/17                                                                                            | 8.4                         | 21           | FA 1mg/d (17), Or Pred (9)               | Unk                                                                                                                                         | Unk                            |

|                           |    |                                                                                                                           |       |                |                                                                                                                                                |                                                                                                                                                                                                                    |                                 |
|---------------------------|----|---------------------------------------------------------------------------------------------------------------------------|-------|----------------|------------------------------------------------------------------------------------------------------------------------------------------------|--------------------------------------------------------------------------------------------------------------------------------------------------------------------------------------------------------------------|---------------------------------|
| Kreuter, 135 (2005)       | M  | Decrease of clinical score: MD 6                                                                                          | 12    | None           | MP (7)                                                                                                                                         | Nausea (3), headache (3), elevation of liver enzymes (1)                                                                                                                                                           | None                            |
| Li, 130 (2019)            | M  | PGA-A, mLoSSI, LSCAM scores decreased in all groups 44/44, no significant differences in treatment failure between groups | Unk   | Unk            | Pred (32)                                                                                                                                      | Blurred vision (1), gastrointestinal problems (11), hair thinning (1), infection (3), laboratory abnormalities (3), lip and nasal ulcer (1), medication intolerance (5), mood problems (5), seizure recurrence (1) | Dehydration/gastroenteritis (1) |
| Mertens, 65 (2016)        | M  | Stop due to disease remission: 48/107                                                                                     | Unk   | Unk            | FA (78), SCS (37)                                                                                                                              | Depression (1), fatigue (3), GI discomfort (7), haematotoxicity (2), headache (1), hepatotoxicity (5), pulmonary discomfort (3), renal impairment (1)                                                              | Unk                             |
| Mirsky, 131 (2012)        | M  | No disease relapses: 31/90                                                                                                | Unk   | 20.4           | Unk                                                                                                                                            | Unk                                                                                                                                                                                                                | Unk                             |
| Piram, 132 (2013)         | M  | Significant disease improvement MTX+CST combined compared to MTX or CST alone: OR 5 (95% CI, 1.2-20.7)                    | Unk   | Unk            | Calcipotriene (29), HCQ (20), methylprednisolone 21 mg/kg (20), OCS 0,8 mg/kg (6), tacrolimus (14), TCS (33), UVB (3), vit A or vit E TA (Unk) | Headache, nausea                                                                                                                                                                                                   | Unk                             |
| Platsidaki, 50 (2017)     | M  | Very good response: 6/20<br>Good response: 10/20<br>Fair response: 2/20<br>Failed treatment 2/20                          | ≤12   | Unk            | FA (20), TA                                                                                                                                    | Abdominal pain (4), elevated liver enzymes (1), nausea (4)                                                                                                                                                         | None                            |
| Rattanaekamorn, 69 (2017) | M  | Responders, improvement: 7/7                                                                                              | 8     | Unk            | FA, daily (7)                                                                                                                                  | Mild nausea (1)                                                                                                                                                                                                    | Unk                             |
| Seyger, 136 (1998)        | M  | Significant improvement on MSS and VAS for tightness, no significant improvement on durometer and VAS for itching         | Unk   | Unk            | Unk                                                                                                                                            | Elevated liver enzymes (4), fatigue (2), nausea (2) stomatitis (3), weight loss (1)                                                                                                                                | None                            |
| Shahidi, 42 (2018)        | M  | mLoSSI, LoSDI and MRI: showed significant improvement                                                                     | Unk   | Unk            | FA 1 mg/d, methylprednisolone 20-30 mg/kg/month                                                                                                | Alopecia (6), anorexia (1), fatigue (13), headache (5), hypokalaemia (8), leukopenia (2), nausea (11), striae rubrae (7)                                                                                           | None                            |
| Torok, 30 (2012)          | M  | Significant mLosSI improvement after 1.77 mo: 36/36                                                                       | 4.32  | Unk            | FA 1 mg/d(36), Pred 0.25-2 mg/kg/d (36)                                                                                                        | Anticipator emesis (7), cushingoid facies (23), elevated liver enzymes (1), light striae (2), Or candidiasis (1)                                                                                                   | None                            |
| Uziel, 133 (2000)         | M  | Inactive lesions: 9/11                                                                                                    | 08-52 | Unk            | D-penicillamine (1), IV MP (8), naproxen (1), Pred (3)                                                                                         | Elevated liver enzymes (1), leukopenia (1), nausea (1)                                                                                                                                                             | Unk                             |
| Weibel, 134 (2006)        | M  | Arrest of disease progression: 32/34                                                                                      | 22.8  | Unk            | IV MP (34), CST                                                                                                                                | Abdominal discomfort (4), elevated liver enzymes (6), headache (3), lymphopenia (4), mouth ulcers (3), nausea (14)                                                                                                 | None                            |
| Wlodek, 137 (2018)        | M  | Very well response: 4/8                                                                                                   | Unk   | Unk            | Topical imiquimod (1)                                                                                                                          | Back pain (1), elevated liver enzymes (1), P3NP elevation (1), urinary symptoms (1)                                                                                                                                | None                            |
| Zulian, 51 (2011)         | M  | Decrease in target skin lesion activity<br>MTX: -44.4%<br>Placebo: -12.1%                                                 | Unk   | Unk            | FA (46), Pred 1mg/kg                                                                                                                           | Alopecia (2), fatigue (2), headache (5), hepatotoxicity (3), nausea (8)                                                                                                                                            | None                            |
| Zulian±, 56 (2012)        | M  | Responders: 48/65<br>Relapse: 10/65<br>Lost-to-follow-up: 7/65                                                            | Unk   | Unk [25.6-Unk] | FA (65)                                                                                                                                        | Elevated liver enzymes (3), headache (7), nausea (16), transitory hair loss and fatigue (2)                                                                                                                        | None                            |
| Torrelo, 158 (2017)       | Pa | Good control of active symptoms and signs and no reappearance of further attacks: 5/5                                     | Unk   | Unk            | Pred 1 mg/kg/d (5)                                                                                                                             | Unk                                                                                                                                                                                                                | Unk                             |
| Moustafa, 159 (2015)      | PD | Disease control: 8                                                                                                        | Unk   | Unk            | Unk                                                                                                                                            | Diarrhoea (1), elevated creatinine (9), fatigue (1), hair loss (2), minimally reduces hemoglobin (1), solar purpura (2)                                                                                            | Unk                             |
| Rivitti, 23 (1973)        | PF | Good response: 1/8<br>Slight improvement: 2/8<br>No improvement: 5/8                                                      | Unk   | Unk            | SCS, TCA 4-24 mg (8)                                                                                                                           | None                                                                                                                                                                                                               | Death by bronchopneumonia (1)   |

|                           |     |                                                                                                                                            |          |              |                                                                      |                                                                                                                                                                                                                         |                                          |
|---------------------------|-----|--------------------------------------------------------------------------------------------------------------------------------------------|----------|--------------|----------------------------------------------------------------------|-------------------------------------------------------------------------------------------------------------------------------------------------------------------------------------------------------------------------|------------------------------------------|
| Spring, 160 (2014)        | PN  | Decrease PNASI/PNRS >75%: 10/13<br>Tend to improvement: 2/13<br>Relapse: 1/13                                                              | Unk      | Unk          | Em, TCS                                                              | Fatigue (1), liver enzyme elevation (1), nausea (1), typical side effects (Unk)                                                                                                                                         | Unk                                      |
| Egan, 24 (1999)           | PPP | CST sparing effect: 5/5                                                                                                                    | 4        | Unk          | TCS (3), SCS (4)                                                     | GI discomfort (1)                                                                                                                                                                                                       | None                                     |
| Klejtman, 162 (2018)      | Pr  | Objective complete response: 16/28<br>Subjective complete response 19/28                                                                   | 9.6      | 19           | Unk                                                                  | Anemia (1), asthenia (1), cutaneous abscess (1), elevated liver enzymes (4), hair loss (1), hepatocarcinoma (1), gastrointestinal discomfort (2)                                                                        | Unk                                      |
| Sharma, 161 (2007)        | PrD | MEAN DASI reduction: 7.9                                                                                                                   | Unk      | Unk          | Prednisolone ≤30 mg/d                                                | Dermatophytosis (4), folliculitis (4), furuncles (4)                                                                                                                                                                    | Unk                                      |
| Allison, 138 (2002)       | PRP | Poor response: 5/5                                                                                                                         | Unk      | Unk          | Unk                                                                  | Unk                                                                                                                                                                                                                     | Unk                                      |
| Chapalain, 139 (1999)     | PRP | Significant improvement: 3/5<br>Complete clearance: 2/5                                                                                    | 4        | Unk          | Unk                                                                  | Cytolysis (1)                                                                                                                                                                                                           | None                                     |
| Dicken, 140 (1994)        | PRP | Favourable response (clearing): 8/8                                                                                                        | Unk      | Unk          | TCS                                                                  | None                                                                                                                                                                                                                    | None                                     |
| Knowles, 141 (1970)       | PRP | Complete clearance: 6/6                                                                                                                    | 4-40     | Unk          | TA                                                                   | GI discomfort (1)                                                                                                                                                                                                       | Unk                                      |
| Baum, 34 (2012)           | PV  | Treatment response: 16/19                                                                                                                  | Unk      | Unk          | TA                                                                   | Unk                                                                                                                                                                                                                     | Unk                                      |
| Lever, 142 (1972)         | PV  | Freedom of lesions:<br>Pred -> MTX: 7/15<br>MTX -> pred: 2/9                                                                               | Unk      | Unk [4-121]  | Unk                                                                  | Leukopenia (2)                                                                                                                                                                                                          | None                                     |
| Mashkilleyson, 143 (1988) | PV  | Effective: 42/53<br>Not effective: 6/53<br>Further exacerbation of the disease: 3/53<br>Discontinue due to drug induced side effects: 2/53 | 0.36     | Unk          | SCS (53)                                                             | Gastric ulcer (3), herpes simplex (4), moniliasis (2), necrotizing gingivitis (Unk), pneumonia (8), pyoderma (4), TBC (3)                                                                                               | 0-7 pts (exact number unclear)           |
| Peck, 25 (1971)           | PV  | Lowering antibodies with a correlation with clinical activity: 13/13<br>Steroid sparing: 13/13                                             | Unk      | Unk          | Calcium folinate (10), CST (13)                                      | Gastrointestinal discomfort (1), leukopenia (1), mouth lesions (7), nausea (2)                                                                                                                                          | Unk                                      |
| Smith, 144 (1999)         | PV  | Pred stopped in 6 months: 6/9                                                                                                              | Unk      | Unk [7-55 d] | Pred (9)                                                             | Liver enzyme elevation (2), nausea (1)                                                                                                                                                                                  | Unk                                      |
| Tran, 40 (2013)           | PV  | Improvement in clinical symptoms: 21/23                                                                                                    | Unk      | Unk [0-26]   | FA 1 mg/d, TCA injections, TCS                                       | Haematocrit decrease (1), abnormalities on liver ultrasound (1)                                                                                                                                                         | Unk                                      |
| Lower, 145 (1995)         | Sar | Responders: 16/23<br>Non-responders: 1/23<br>Unk: 5                                                                                        | Unk      | Unk          | Antimalarial agents, nonsteroidals, pred (3)                         | Cough (1), hepatotoxicity (6), mouth sores, nausea                                                                                                                                                                      | Leukopenia requiring hospitalization (1) |
| Veien, 146 (1997)         | Sar | Clearing skin lesions: 12/16                                                                                                               | 16 - 104 | Unk          | Unk                                                                  | Elevated liver enzymes (2), fatigue (2), nausea (6), stomatitis (1)                                                                                                                                                     | None                                     |
| Schanz, 72 (2013)         | ScI | Responders: 12/22<br>Stable disease: 10/22                                                                                                 | Unk      | Unk          | FA 5 mg (22), Prednisolone 1mg/kg after induction phase tapered (22) | Unk                                                                                                                                                                                                                     | Unk                                      |
| Breuckmann, 73 (2005)     | SD  | No response: 7/7                                                                                                                           | NA       | NA           | FA                                                                   | Unk                                                                                                                                                                                                                     | Unk                                      |
| Herrick, 147 (2017)       | SS  | mRSS reduction:<br>MTX: -4.0<br>MMF: -3.8<br>CP: -3.5                                                                                      | Unk      | Unk          | Unk                                                                  | Unk                                                                                                                                                                                                                     | Unk                                      |
| Pope, 150 (2001)          | SS  | No significant differences in UCLA skin score, modified Rodnan score and MD global assessment                                              | Unk      | Unk          | Additional MTX 1.25-3.5 mg/week (11)                                 | Or ulcers (1)                                                                                                                                                                                                           | MTX (3), placebo (7)                     |
| Sumanth, 148 (2007)       | SS  | Improvement of skin score:<br>Excellent: 1/33<br>Moderate: 4/33                                                                            | Unk      | Unk          | Unk                                                                  | Nausea/vomiting (3), fever (2), edema (2), increased bilirubin (2), alopecia (92), anorexia (1), dyspnea (1), headache (1), elevated liver enzymes (1), upper respiratory tract infection (1), angiedema (1), fever (1) | Unk                                      |



|                            |    |                                                                               |     |            |                                            |                                                                                                                                                                                                                                                                           |                                                 |
|----------------------------|----|-------------------------------------------------------------------------------|-----|------------|--------------------------------------------|---------------------------------------------------------------------------------------------------------------------------------------------------------------------------------------------------------------------------------------------------------------------------|-------------------------------------------------|
|                            |    | Mild: 12/33<br>None: 3/33<br>Deterioration: 5/33<br>Lost-to-follow-up: 8/33   |     |            |                                            |                                                                                                                                                                                                                                                                           |                                                 |
| Van den Hoogen, 149 (1996) | SS | Significant improvement of TSS and VAS:<br>MTX: 8/17<br>Placebo: 1/12         | Unk | Unk        | Pred <10 mg/d                              | Elevated liver enzymes (6), headache (1), pancytopenia (1)                                                                                                                                                                                                                | Renal crisis (1), sudden death (1)              |
| Leducq, 151 (2019)         | Ur | Complete urticaria remission (ITT):<br>MTX: 3/38<br>Placebo: 0/32             | Unk | Unk        | H1-AH (39)                                 | Anemia (4), asthenia (4), cholestasis (5), elevated liver enzymes (17), gastrointestinal discomfort (17), headache (3), insomnia (1), leukopenia (4), lymphopenia (3), nasopharyngitis (5), neutropenia (1), respiratory tract infection (4), urinary tract infection (1) | Cerebrovascular stroke (1), unstable angina (1) |
| Perez, 66 (2010)           | Ur | Responders: 12/16<br>Steroid sparing: 2/16                                    | Unk | Unk        | FA 5 mg (16), Prednisolone 10-60 mg/d (16) | Dyspnea (1), fatigue, hair thinning                                                                                                                                                                                                                                       | Unk                                             |
| Sagi, 58 (2011)            | Ur | Complete clinical remission: 7/8<br>No response: 1/8                          | 3-5 | Unk [4-15] | AH (5), FA 5 mg (8), Pred (8)              | Gastrointestinal discomfort (2), liver enzymes elevation (1), subjective fatigue (1)                                                                                                                                                                                      | None                                            |
| Sharma, 152 (2014)         | Ur | >2/3 of baseline urticaria scores achieved:<br>MTX: 3.5/10<br>Placebo: 3.67/7 | Unk | Unk        | Levocetirizine 5 mg/d (Unk)                | Liver enzyme elevation (2), uncontrollable nausea (1), vomiting (1)                                                                                                                                                                                                       | None                                            |
| AlGhamdi, 37 (2013)        | Vi | Clinical improvement: no change (6/6)                                         | Unk | Unk        | FA, 5 mg/d                                 | None                                                                                                                                                                                                                                                                      | None                                            |
| Singh, 47 (2015)           | Vi | New vitiliginous lesions:<br>MTX: 6/25<br>CST 7/25                            | Unk | Unk        | FA 5 mg/week                               | Nausea (4), severe nausea (1)                                                                                                                                                                                                                                             | None                                            |

~ - at the end of treatment duration, see reference for definition of outcomes

AA: Alopecia areata, AB: Antibiotics, AD: Atopic dermatitis, AH: Antihistamines, All CE: Allergic Contact Eczema, AO: Adult onset, AZA: Azathioprine, BP: Bullous pemphigoid, CP: Cyclophosphamide, CQ: Chloroquine, CSA: Ciclosporin, CSS: Clinical severity score, CST: Corticosteroids, D: Day, DM: Dermatomyositis, E: Eczema, EF: Eosinophilic fasciitis, Em: Emollients, ENL: Eythema Nodosum Leprosum, ET: Etretnate, FA: Folic acid, G: Gram, GA: Granuloma Annulare, GD: Gastroduodenal, GCS: Glucocorticosteroids, GI: Gastrointestinal, HCQ: Hydroxychloroquine, IL: Intralesional, ITT: Intention to treat, IV: Intravenous, IVIG: Intravenous immunoglobulin, LE: Lupus erythematosus, LP: Lichen planus, LPP: Lichen planopilaris, LS: Lichen Sclerosus (extra genital), LyP: Lymphomatoid papulosis, M: Morphea, mg: milligram, MMF: Mycophenolate Mofetil, MNX: Minoxidil, Mo: Month, MP: Methylprednisolone, MTX: Methotrexate, Or: Oral, OCS: Oral Corticosteroids, Pa: Panniculitis, PD: Papular Dermatitis, PGA: Patient Global Assessment, PF: Pemphigus Foliaceus, epidemical, fogo selvage, PPP: Palmopantar pompholyx, PN: Prurigo Nodularis, Pred: Prednisone, Pr: Prurigo, PrD: Parthenium Dermatitis, PRP: Pityriasis rubra pilaris, Pt: Patient, Pts: Patients, PV: Pemphigus vulgaris, RCT: Randomized Controlled Trial, SAB: Systemic antibiotics, SAH: Systemic Antihistamines, Sar: Sarcoidosis, SCORAD: SCORing of Atopic Dermatitis, SCS: Systemic corticosteroids, Scl: Scleroderma, SD: Sclerodema diabeticorum, SS: Systemic sclerosis, TA: Topical agents, TAC: Tacrolimus, TCA: Triamcinolone, TCI: Topical calcineurin inhibitor, TCS: Topical corticosteroids, Unk: Unknown, Ur: Urticaria, UVB: Ultraviolet-B, VAS: Visual analogue scale, Vi: Vitiligo, Vit: Vitamin, Wk: Week
